# Supplementary material for: Verification of Thai ethnobotanical medicine “Kamlang Suea Khrong” driven by multiplex PCR and powerful TLC techniques
Source: PLOS journal article supplement (doi:10.1371/journal.pone.0257243), 2021-09-17
Supplement: S1 (10.1371/journal.pone.0257243.s001) [file journal.pone.0257243.s001]

**A**

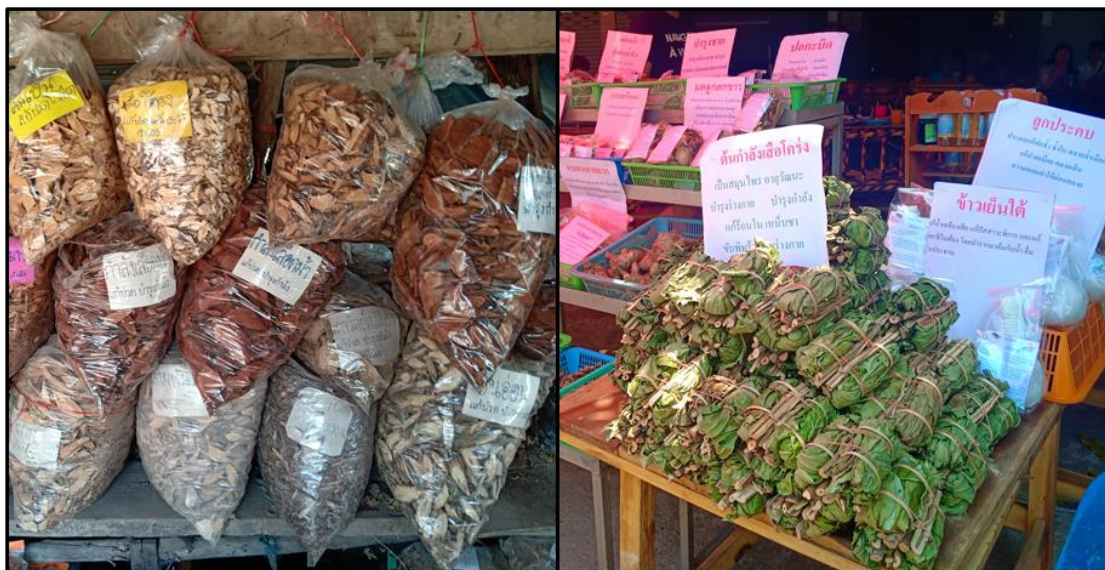

**B**

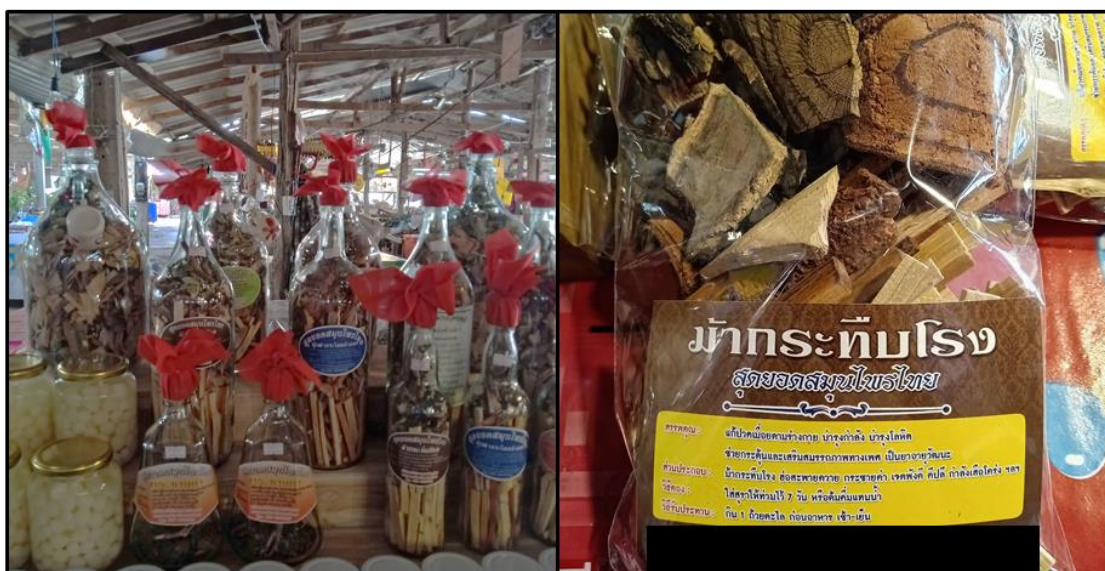

**S1 Fig. Commercial KSK crude drugs in Thai herbal markets.** They were sold as single herb (A) or admixture in “Ya tom” or “Ya dong” recipes (B).
