# Supplementary material for: Verification of Thai ethnobotanical medicine “Kamlang Suea Khrong” driven by multiplex PCR and powerful TLC techniques
Source: PLoS One. 2021 Sep 17;16(9):e0257243. doi: 10.1371/journal.pone.0257243 (PMC8448358; doi:10.1371/journal.pone.0257243)
Supplement: S1 Spreadsheet — (XLSX) [file pone.0257243.s007.xlsx]

## Sheet: S1 Spreadsheet. ITS2 sequence 
S1 Spreadsheet. ITS2 sequence alignment for species-specific primers design and tree topology analysis.
Domain: Data
Betula alleghaniensis KT308925	-	-	A	T	C	G	T	T	G	C	C	C	C	C	A	A	C	C	C	C	A	-	-	-	-	-	-	-	T	C	T	C	C	T	T	G	C	A	A	A	G	G	G	A	C	G	A	G	G
Betula alnoides AY761101	-	-	.	.	.	.	.	.	.	.	.	.	.	.	.	.	.	.	.	.	.	-	-	-	-	-	-	-	.	.	.	.	.	.	.	.	.	.	.	.	.	.	.	.	.	.	.	.	.
Betula alnoides LC509575-87	-	-	.	.	.	.	.	.	.	.	.	.	.	.	.	.	.	.	.	.	.	-	-	-	-	-	-	-	.	.	.	.	.	.	.	.	.	.	.	.	.	.	.	.	.	.	.	.	.
Betula glandulosa AY761110	-	-	.	.	.	.	.	.	.	.	.	.	.	.	.	.	.	.	.	.	.	-	-	-	-	-	-	-	.	.	.	.	.	.	.	.	.	.	.	.	.	.	.	.	.	.	.	.	-
Betula glandulosa KT308995	-	-	.	.	.	.	.	.	.	.	.	.	.	.	.	.	.	.	.	.	.	-	-	-	-	-	-	-	.	.	.	.	.	.	.	.	T	.	.	.	.	.	.	.	.	.	.	.	.
Betula glandulosa KT309017	-	-	.	.	.	.	.	.	.	.	.	.	.	.	.	.	.	.	.	.	.	-	-	-	-	-	-	-	.	.	.	.	.	.	.	.	.	.	.	.	.	.	.	.	.	.	.	.	.
Betula lenta KT308937	-	-	.	.	.	.	.	.	.	.	.	.	.	.	.	.	.	.	.	.	.	-	-	-	-	-	-	-	.	.	.	.	.	.	.	.	.	.	.	.	.	.	.	.	.	.	.	.	.
Betula nana AY352336	-	-	.	.	.	.	.	.	.	.	.	.	.	.	.	.	.	.	.	.	.	-	-	-	-	-	-	-	.	.	.	.	.	.	.	.	.	.	.	.	.	.	.	.	.	.	.	.	.
Betula nana KT309019	-	-	.	.	.	.	.	.	.	.	.	.	.	.	.	.	.	.	.	.	.	-	-	-	-	-	-	-	.	.	.	.	.	.	.	.	A	.	.	.	.	.	.	.	.	.	.	.	.
Betula occidentalis AY761125	-	-	.	.	.	.	.	.	.	.	.	.	.	.	.	.	.	.	.	.	.	-	-	-	-	-	-	-	.	.	.	.	.	.	.	.	.	.	.	.	.	.	.	.	.	.	.	.	.
Betula papyrifera AY761126	-	-	.	.	.	.	.	.	.	.	.	.	.	.	.	.	.	.	.	.	.	-	-	-	-	-	-	-	.	.	.	.	.	.	.	.	T	.	.	.	.	.	.	.	.	.	.	.	.
Betula papyrifera KT309011	-	-	.	.	.	.	.	.	.	.	.	.	.	.	.	.	.	.	.	.	.	-	-	-	-	-	-	-	.	.	.	.	.	.	.	.	T	.	.	.	.	.	.	.	.	.	.	.	.
Betula papyrifera KT309013	-	-	.	.	.	.	.	.	.	.	.	.	.	.	.	.	.	.	.	.	.	-	-	-	-	-	-	-	.	.	.	.	.	.	.	.	.	.	.	.	.	.	.	.	.	.	.	.	.
Betula pendula AY352332	-	-	.	.	.	.	.	.	.	.	.	.	.	.	.	.	.	.	.	.	.	-	-	-	-	-	-	-	.	.	.	.	.	.	.	.	.	.	.	.	.	.	.	.	.	.	.	.	.
Betula pendula DQ499089	-	-	.	.	.	.	.	.	.	.	.	.	.	.	.	.	.	.	.	.	.	-	-	-	-	-	-	-	.	.	.	.	.	.	.	.	.	.	.	.	.	.	.	.	.	.	.	.	.
Betula pendula KT308991	-	-	.	.	.	.	.	.	.	.	.	.	.	.	.	.	.	.	.	.	.	-	-	-	-	-	-	-	.	.	.	.	.	.	.	.	.	.	.	.	.	.	.	.	.	.	.	.	.
Betula pubescens AY761130	-	-	.	.	.	.	.	.	.	.	.	.	.	.	.	.	.	.	.	.	.	-	-	-	-	-	-	-	.	.	.	.	.	.	.	.	.	.	.	.	.	.	.	.	.	.	.	.	.
Betula pubescens KT308969	-	-	.	.	.	.	.	.	.	.	.	.	.	.	.	.	.	.	.	.	.	-	-	-	-	-	-	-	.	.	.	.	.	.	.	.	.	.	.	.	.	.	.	.	.	.	.	.	.
Betula pubescens KT308972	-	-	.	.	.	.	.	.	.	.	.	.	.	.	.	.	.	.	.	.	.	-	-	-	-	-	-	-	.	.	.	.	.	.	.	.	.	.	.	.	.	.	.	.	.	.	.	.	.
Betula pubescens KT308977	-	-	.	.	.	.	.	.	.	.	.	.	.	.	.	.	.	.	.	.	.	-	-	-	-	-	-	-	.	.	.	.	.	.	.	.	.	.	.	.	.	.	.	.	.	.	.	.	.
Betula platyphylla AY761128	-	-	.	.	.	.	.	.	.	.	.	.	.	.	.	.	.	.	.	.	.	-	-	-	-	-	-	-	.	.	.	.	.	.	.	.	.	.	.	.	.	.	.	.	.	.	.	.	.
Betula pumila AJ783642	-	-	.	.	.	.	.	.	.	.	.	.	.	.	.	.	.	.	.	.	.	-	-	-	-	-	-	-	.	.	.	.	.	.	.	.	M	.	.	.	.	.	.	.	.	.	.	.	.
Betula pumila AY761131	-	-	.	.	.	.	.	.	.	.	.	.	.	.	.	.	.	.	.	.	.	-	-	-	-	-	-	-	.	.	.	.	.	.	.	.	A	.	.	.	.	.	.	.	.	.	.	.	.
Betula schmidtii AY761133	-	-	.	.	.	.	.	.	.	.	.	.	.	.	.	.	.	.	.	.	.	-	-	-	-	-	-	-	.	.	.	.	.	.	.	.	.	.	.	.	.	.	.	.	.	.	.	.	.
Strychnos aculeata JF937940	A	T	C	G	.	.	.	C	.	.	.	.	.	.	-	-	-	.	.	.	.	C	A	C	G	C	C	A	A	.	.	.	-	-	-	-	-	-	-	-	A	.	.	C	.	.	T	.	C
Strychnos afzelii JF937941	A	T	C	G	.	.	.	C	.	.	T	.	.	.	-	-	-	.	.	.	.	C	A	C	G	C	C	C	A	.	.	.	-	-	-	-	-	-	-	-	T	.	.	C	.	.	T	.	C
Strychnos axillaris LC509588	A	T	C	G	.	.	.	C	.	.	.	.	.	-	-	-	-	.	.	.	.	T	G	C	G	C	C	C	A	.	.	.	-	-	-	-	-	-	-	-	A	.	.	C	.	.	T	.	C
Strychnos axillaris LC509589-93	A	T	C	G	.	.	.	C	.	.	.	.	.	-	-	-	-	.	.	.	.	T	G	C	G	C	C	C	A	.	.	.	-	-	-	-	-	-	-	-	A	.	.	C	.	.	T	.	C
Strychnos axillaris LC509594	A	T	C	G	.	.	.	C	.	.	.	.	.	.	-	-	-	.	.	.	.	T	G	C	G	C	C	C	A	.	.	.	-	-	-	-	-	-	-	-	A	.	.	C	.	.	T	.	C
Strychnos axillaris LC509595	A	T	C	G	.	.	.	C	.	.	.	.	.	.	-	-	-	.	.	.	.	T	G	C	G	C	C	C	A	.	.	.	-	-	-	-	-	-	-	-	A	.	.	C	.	.	T	.	C
Strychnos camptoneura JF937958	A	T	C	G	.	.	.	C	.	A	.	.	.	-	-	-	-	.	.	.	G	-	-	-	-	-	-	-	-	-	-	-	-	-	-	-	-	-	-	-	-	-	-	-	-	-	-	-	-
Strychnos decussata JF937972	A	T	C	G	.	.	.	C	.	.	.	.	.	.	-	-	-	.	.	.	.	C	A	C	G	C	C	G	A	.	.	.	-	-	-	-	-	-	-	-	.	T	.	C	.	.	T	.	T
Strychnos dinklagei JF937973	A	T	C	G	.	.	.	C	.	A	T	.	.	.	-	-	-	.	.	A	.	C	A	C	G	C	C	A	A	.	A	.	-	-	-	-	-	-	-	-	A	.	.	C	.	.	T	.	C
Strychnos floribunda JF937981	A	T	C	G	.	.	.	C	.	.	.	.	.	-	-	-	-	T	.	.	.	C	A	C	G	C	C	G	A	.	.	.	-	-	-	-	-	-	-	-	-	.	.	C	.	.	T	.	C
Strychnos ignatii JF937986	A	T	C	G	.	.	.	C	.	.	T	.	.	.	-	-	-	.	.	.	G	C	A	C	G	C	C	C	G	.	.	.	-	-	-	-	-	-	-	-	.	.	.	C	.	.	T	.	C
Strychnos mattogrossensis JF937998	A	T	C	G	.	.	.	C	.	.	.	.	.	.	-	-	-	.	.	.	G	C	A	C	G	C	C	A	.	.	.	.	-	-	-	-	-	-	-	-	T	.	.	C	.	.	T	.	C
Strychnos minor JF938003	A	T	C	G	.	.	.	C	.	A	T	.	.	.	-	-	-	.	.	A	.	C	A	C	G	C	C	A	A	.	.	T	-	-	-	-	-	-	-	-	A	.	.	C	.	.	T	.	C
Strychnos minor JF938004	A	T	C	G	.	.	.	C	.	A	T	.	.	.	-	-	-	.	.	A	.	C	A	C	G	C	C	A	A	.	.	.	-	-	-	-	-	-	-	-	A	.	.	C	T	.	T	.	T
Strychnos minor JF938042	A	T	C	G	.	.	.	C	.	A	T	.	.	.	-	-	-	.	.	A	.	C	A	Y	G	C	C	A	A	.	.	.	-	-	-	-	-	-	-	-	A	.	.	C	T	.	T	.	T
Strychnos mitscherlichii JF938006	A	T	C	G	.	.	.	C	.	.	.	.	.	.	-	-	-	.	.	.	.	C	A	C	G	C	C	C	G	.	.	.	-	-	-	-	-	-	-	-	.	.	.	C	.	.	T	.	C
Strychnos mitscherlichii JF938007	A	T	C	G	.	.	.	C	.	.	.	.	.	.	-	-	-	.	.	.	.	C	A	C	T	C	C	C	A	.	.	.	-	-	-	-	-	-	-	-	.	.	.	C	.	.	T	.	C
Strychnos mostueoides JF938008	T	T	.	A	G	T	G	.	C	.	T	A	A	.	.	T	A	.	.	.	G	T	A	C	A	C	C	T	.	.	.	.	-	-	-	-	-	-	-	-	.	A	.	C	T	.	T	.	C
Strychnos nux-vomica JF938015	A	T	C	G	.	.	.	C	T	.	T	.	.	.	-	-	-	.	.	.	.	C	A	C	G	C	C	T	G	.	.	.	-	-	-	-	-	-	-	-	.	.	.	C	.	.	T	.	C
Strychnos nux-vomica JX856499	A	T	C	G	.	.	.	C	.	.	T	.	.	.	-	-	-	.	.	.	.	C	A	C	G	C	C	C	.	.	.	.	-	-	-	-	-	-	-	-	.	.	.	C	.	.	T	.	C
Strychnos oiapocensis JF938016	A	T	C	G	.	.	.	C	.	.	.	.	.	.	-	-	-	.	.	.	.	C	A	C	G	C	C	C	A	.	.	.	-	-	-	-	-	-	-	-	.	.	.	C	.	.	T	.	C
Strychnos potatorum JF938027	A	T	C	G	.	.	.	C	.	T	.	.	.	.	-	-	-	.	.	.	.	C	A	C	G	C	C	C	.	.	.	.	-	-	-	-	-	-	-	-	.	.	.	C	.	.	T	.	C
Strychnos potatorum JX856502	A	T	C	G	.	.	.	C	.	T	.	.	.	.	-	-	-	.	.	.	.	C	A	C	G	C	C	C	.	.	.	.	-	-	-	-	-	-	-	-	.	.	.	C	.	.	T	.	C
Strychnos potatorum JX856503	A	T	C	G	.	.	.	C	.	T	.	.	.	.	-	-	-	.	.	.	.	C	A	C	G	C	C	C	.	.	.	.	-	-	-	-	-	-	-	-	.	.	.	C	.	.	T	.	C
Strychnos pseudoquina JF938028	A	T	C	G	.	.	.	C	.	.	.	.	.	.	-	-	-	.	.	.	.	C	A	C	G	C	C	C	A	.	.	?	-	-	-	-	-	-	-	-	.	.	.	C	.	.	T	.	C
Strychnos spinosa JF938049	A	T	C	G	.	.	.	C	.	A	.	.	.	-	-	-	-	.	.	.	.	C	A	C	G	C	C	G	A	.	.	.	-	-	-	-	-	-	-	-	A	.	.	C	.	.	T	.	C
Ziziphus attopensis LC509596	A	C	.	A	.	.	.	.	.	.	.	.	.	.	C	.	.	.	.	.	C	A	A	C	G	T	C	G	A	.	C	A	-	-	-	-	-	-	-	-	C	.	.	.	G	.	G	.	.
Ziziphus attopensis LC509597	A	C	.	A	.	.	.	.	.	.	.	.	.	.	C	.	.	.	.	.	C	A	A	C	G	T	C	G	A	.	C	A	-	-	-	-	-	-	-	-	C	.	.	.	G	.	G	.	.
Ziziphus attopensis LC509598	A	C	.	A	.	.	.	.	.	.	.	.	.	.	C	.	.	.	.	.	C	A	A	C	G	T	C	G	A	.	C	A	-	-	-	-	-	-	-	-	C	.	.	.	G	.	G	.	.
Ziziphus attopensis LC509599	A	C	.	A	.	.	.	.	.	.	.	.	.	.	C	.	.	.	.	.	C	A	A	C	G	T	C	G	A	.	C	A	-	-	-	-	-	-	-	-	C	.	.	.	G	.	G	.	.
Ziziphus glabrata DQ146583	-	-	.	A	.	.	.	.	.	.	.	.	.	-	-	-	-	.	.	.	.	A	C	C	T	C	C	G	C	.	.	.	-	-	-	-	-	-	-	-	-	.	.	.	A	.	G	.	A
Ziziphus jujuba DQ146573	-	-	.	A	.	.	.	.	.	.	.	.	.	.	C	.	T	.	.	.	.	A	C	C	T	C	G	A	C	.	.	.	-	-	-	-	-	-	-	-	.	A	.	G	.	.	.	A	.
Ziziphus jujuba DQ146577	-	-	.	A	.	.	.	.	.	.	.	.	.	.	C	.	T	.	.	.	.	A	C	C	T	C	G	A	C	.	.	.	-	-	-	-	-	-	-	-	.	A	.	G	.	.	.	A	.
Ziziphus mauritiana DQ146588	-	-	.	A	.	.	.	.	.	.	.	.	.	-	-	-	-	.	.	.	.	A	C	C	T	C	C	G	C	.	.	.	-	-	-	-	-	-	-	-	-	.	.	.	A	.	G	.	A
Ziziphus mauritiana DQ146589	-	-	.	A	.	.	.	.	.	.	.	.	.	-	-	-	-	.	.	.	.	A	C	C	T	C	C	G	C	.	.	.	-	-	-	-	-	-	-	-	-	.	.	.	A	.	G	.	A
Ziziphus mucronata DQ146592	-	-	.	A	.	.	.	.	.	.	.	.	.	-	-	-	-	.	.	.	.	A	C	C	T	C	G	A	C	.	.	.	.	-	-	-	-	-	-	-	.	.	.	G	A	.	.	.	.
Ziziphus mucronata DQ146593	-	-	.	A	.	.	.	.	.	.	.	.	.	.	-	-	.	.	.	.	.	A	C	C	T	C	G	A	C	.	.	.	-	-	-	-	-	-	-	-	-	C	.	.	G	.	.	.	A
Ziziphus mucronata KR083102	-	-	.	A	.	.	.	.	.	.	.	.	.	-	-	-	-	.	.	.	.	A	C	C	T	C	G	A	A	.	C	T	-	-	-	-	-	-	-	-	C	C	.	G	G	.	.	.	A
Ziziphus oenoplia DQ146598	A	C	.	A	.	.	.	.	.	.	.	.	.	.	C	.	.	.	.	.	C	G	C	C	G	T	C	G	A	.	C	A	-	-	-	-	-	-	-	-	C	.	.	.	G	.	G	.	A
Ziziphus rugosa DQ146601	-	-	.	A	.	.	.	.	.	.	.	.	.	-	-	-	-	.	.	.	.	A	A	C	C	T	C	G	A	.	C	T	-	-	-	-	-	-	-	-	A	.	.	.	G	.	G	.	A
Ziziphus spina-christi DQ146602	-	-	.	A	.	.	.	.	.	.	.	.	.	-	-	-	-	.	.	.	.	A	C	C	T	C	C	G	C	.	.	.	-	-	-	-	-	-	-	-	-	.	.	.	A	.	G	.	A
Ziziphus spina-christi DQ146603	-	-	.	A	.	.	.	.	.	.	.	.	.	-	-	-	-	.	.	.	.	A	C	C	T	C	C	G	C	.	.	.	-	-	-	-	-	-	-	-	-	.	.	.	A	.	G	.	A
Betula alleghaniensis KT308925	A	G	C	T	C	A	T	G	C	A	T	G	C	G	G	T	T	G	G	C	C	T	-	A	A	A	A	G	C	G	A	G	T	C	C	T	C	G	G	C	G	A	C	G	C	G	C	G	C
Betula alnoides AY761101	.	.	.	.	.	.	.	.	.	.	.	.	.	.	.	.	.	.	.	.	.	.	-	.	.	.	.	.	.	.	.	.	.	.	.	.	.	.	.	.	.	.	.	.	.	.	.	.	.
Betula alnoides LC509575-87	T	.	.	.	.	.	.	.	.	G	.	.	.	.	.	.	.	.	.	.	.	.	-	.	.	.	.	.	.	.	.	.	.	.	.	.	.	.	.	.	.	.	.	.	.	.	.	.	.
Betula glandulosa AY761110	.	.	.	.	T	.	C	.	.	.	.	.	.	.	.	.	.	.	.	.	.	.	-	.	.	.	.	.	.	.	.	.	.	.	.	.	.	.	.	.	.	.	.	.	.	.	.	.	.
Betula glandulosa KT308995	.	.	.	.	.	.	.	.	.	.	.	.	.	.	.	.	.	.	.	.	.	.	-	.	.	.	.	.	.	.	.	.	.	.	.	.	.	.	.	.	.	.	.	.	.	R	.	.	.
Betula glandulosa KT309017	.	.	.	.	.	.	.	.	.	.	.	.	.	.	.	.	.	.	.	.	.	.	-	.	.	.	.	.	.	.	.	.	.	.	.	.	.	.	.	.	.	.	.	.	.	.	.	.	.
Betula lenta KT308937	.	.	.	.	.	.	.	.	.	.	.	.	.	.	.	.	.	.	.	.	.	.	-	.	.	.	.	.	.	.	.	.	.	.	.	.	.	.	.	.	.	.	.	.	.	.	.	.	.
Betula nana AY352336	.	.	.	.	.	.	.	.	.	.	.	.	.	.	.	.	.	.	.	.	.	.	-	.	.	.	.	.	.	.	.	.	.	.	.	.	.	.	.	.	.	.	.	.	.	.	.	.	.
Betula nana KT309019	.	.	.	.	.	.	.	.	.	.	.	.	.	.	.	.	.	.	.	.	.	.	-	.	.	.	.	.	.	.	.	.	.	.	.	.	.	.	.	.	.	.	.	.	.	.	.	.	.
Betula occidentalis AY761125	.	.	.	.	.	.	.	.	.	.	.	.	.	.	.	.	.	.	.	.	.	.	-	.	.	.	.	.	.	.	.	.	.	.	.	.	.	.	.	.	.	.	.	.	.	.	.	.	.
Betula papyrifera AY761126	.	.	.	.	.	.	.	.	.	.	.	.	.	.	.	.	.	.	.	.	.	.	-	.	.	.	.	.	.	.	.	.	.	.	.	.	.	.	.	.	.	.	.	.	.	.	.	.	.
Betula papyrifera KT309011	.	.	.	.	.	.	.	.	.	.	.	.	.	.	.	.	.	.	.	.	.	.	-	.	.	.	.	.	.	.	.	.	.	.	.	.	.	.	.	.	.	.	.	.	.	.	.	.	.
Betula papyrifera KT309013	.	.	.	.	.	.	.	.	.	.	.	.	.	.	.	.	.	.	.	.	.	.	-	.	.	.	.	.	.	.	.	.	.	.	.	.	.	.	.	.	.	.	.	.	.	.	.	.	.
Betula pendula AY352332	.	.	.	.	.	.	.	.	.	.	.	.	.	.	.	.	.	.	.	.	.	.	-	.	.	.	.	.	.	.	.	.	.	.	.	.	.	.	.	.	.	.	.	.	.	.	.	.	.
Betula pendula DQ499089	.	.	.	.	.	.	.	.	.	.	.	.	.	.	.	.	.	.	.	.	.	.	-	.	.	.	.	.	.	.	.	.	.	.	.	.	.	.	.	.	.	.	.	.	.	.	.	.	.
Betula pendula KT308991	.	.	.	.	.	.	.	.	.	.	.	.	.	.	.	.	.	.	.	.	.	.	-	.	.	.	.	.	.	.	.	.	.	.	.	.	.	.	.	.	.	.	.	.	.	.	.	.	.
Betula pubescens AY761130	.	.	.	.	.	.	.	.	.	.	.	.	.	.	.	.	.	.	.	.	.	.	-	.	.	.	.	.	.	.	.	.	.	.	.	.	-	.	.	.	.	.	.	.	.	.	.	.	.
Betula pubescens KT308969	.	.	.	.	.	.	.	.	.	.	.	.	.	.	.	.	.	.	.	.	.	.	-	.	.	.	.	.	.	.	.	.	.	.	.	.	.	.	.	.	.	.	.	.	.	.	.	.	.
Betula pubescens KT308972	.	.	.	.	.	.	.	.	.	.	.	.	.	.	.	.	.	.	.	.	.	.	-	.	.	.	.	.	.	.	.	.	.	.	.	.	.	.	.	.	.	.	.	.	.	.	.	.	.
Betula pubescens KT308977	.	.	.	.	.	.	.	.	.	.	.	.	.	.	.	.	.	.	.	.	.	.	-	.	.	.	.	.	.	.	.	.	.	.	.	.	.	.	.	.	.	.	.	.	.	.	.	.	.
Betula platyphylla AY761128	.	.	.	.	.	.	.	.	.	.	.	.	.	.	.	.	.	.	.	.	.	.	-	.	.	.	.	.	.	.	.	.	.	.	.	.	-	.	.	.	.	.	.	.	.	.	.	.	.
Betula pumila AJ783642	.	.	.	.	.	.	.	.	.	.	.	.	.	.	.	.	.	.	.	.	.	.	-	.	.	.	.	.	.	.	.	.	.	.	.	.	.	.	.	.	.	.	.	.	.	.	.	.	.
Betula pumila AY761131	.	.	.	.	.	.	.	.	.	.	.	.	.	.	.	.	.	.	.	.	.	.	-	.	.	.	.	.	.	.	.	.	.	.	.	.	.	.	.	.	.	.	.	.	.	.	.	.	.
Betula schmidtii AY761133	.	.	.	.	T	.	.	.	.	.	.	.	.	.	.	.	.	.	.	.	.	.	-	.	.	.	.	.	.	.	.	.	.	.	.	.	.	.	.	.	.	.	.	.	.	.	.	.	.
Strychnos aculeata JF937940	-	-	-	-	.	T	G	.	.	G	C	.	.	.	.	.	.	.	.	.	.	.	-	.	.	.	T	.	A	A	.	.	A	.	.	C	T	C	C	.	.	.	.	.	G	.	.	.	T
Strychnos afzelii JF937941	-	-	-	-	.	T	.	T	.	T	.	.	.	.	.	.	.	.	.	.	.	.	-	.	.	.	T	.	A	.	.	.	.	.	.	C	T	C	C	.	.	.	.	.	G	.	.	.	T
Strychnos axillaris LC509588	-	-	-	-	.	T	.	T	.	T	.	.	.	.	.	.	.	.	.	T	.	.	-	.	.	.	T	.	A	.	.	.	.	.	T	C	T	C	C	.	.	.	T	.	G	.	.	.	T
Strychnos axillaris LC509589-93	-	-	-	-	.	T	.	T	.	T	.	.	.	.	.	.	.	.	.	T	.	.	-	.	.	.	T	.	A	.	.	.	.	.	T	C	T	C	C	.	.	.	T	.	G	.	.	.	T
Strychnos axillaris LC509594	-	-	-	-	.	T	.	T	.	T	.	.	.	.	.	.	.	.	.	T	.	.	-	.	.	.	T	.	A	.	.	.	.	.	T	C	T	C	C	.	.	.	T	.	G	.	.	.	T
Strychnos axillaris LC509595	-	-	-	-	.	T	.	T	.	T	.	.	.	.	.	.	.	.	.	T	.	.	-	.	.	.	T	.	A	.	.	.	.	.	T	C	T	C	C	.	.	.	T	.	G	.	.	.	T
Strychnos camptoneura JF937958	-	-	-	-	.	T	G	.	.	G	C	.	.	.	.	C	.	.	.	.	.	.	-	.	.	.	T	.	.	.	.	.	.	.	.	C	T	C	C	.	.	.	.	.	G	.	.	.	T
Strychnos decussata JF937972	-	-	-	-	.	T	A	.	.	.	C	.	.	.	.	.	.	.	.	.	.	.	-	.	.	.	T	.	A	.	.	.	.	.	.	C	T	C	C	.	.	.	.	.	G	.	.	.	T
Strychnos dinklagei JF937973	-	-	-	-	.	C	A	.	.	G	C	.	.	.	.	.	.	.	.	.	.	.	-	.	.	.	T	.	A	.	.	.	.	.	.	C	A	C	C	.	.	.	.	.	G	.	.	.	T
Strychnos floribunda JF937981	-	-	-	-	.	T	G	.	.	G	C	.	.	.	.	C	.	.	.	.	.	.	-	.	.	.	T	.	A	.	G	.	.	.	.	C	T	C	T	.	.	.	.	.	G	.	.	.	T
Strychnos ignatii JF937986	-	-	-	-	.	T	A	.	.	G	C	.	.	.	.	.	.	.	.	.	.	.	-	.	.	.	T	.	A	.	.	.	.	.	.	C	T	C	C	.	.	.	.	.	G	.	.	.	T
Strychnos mattogrossensis JF937998	-	-	-	-	T	T	G	C	.	G	C	.	.	.	.	.	.	.	.	.	.	.	A	.	.	.	C	.	A	.	.	.	.	.	.	C	T	C	C	.	.	.	.	.	G	.	.	.	T
Strychnos minor JF938003	-	-	-	-	.	C	A	.	.	G	C	.	.	.	.	.	.	.	.	.	.	.	-	.	.	.	T	.	A	.	.	.	.	.	.	C	T	C	C	.	.	.	.	.	G	.	.	.	T
Strychnos minor JF938004	-	-	-	-	.	C	A	T	.	.	.	.	.	.	.	.	.	.	.	.	.	.	-	.	.	.	T	.	A	.	.	.	C	.	.	C	A	C	C	T	.	.	.	.	G	.	.	.	T
Strychnos minor JF938042	-	-	-	-	.	C	A	K	.	.	.	.	.	.	.	.	.	.	.	.	.	.	-	.	.	.	T	.	A	.	.	.	C	.	.	C	A	C	C	T	.	.	.	.	G	.	.	.	T
Strychnos mitscherlichii JF938006	-	-	-	-	.	T	.	T	.	C	C	.	.	.	.	.	.	.	.	.	.	.	-	.	.	.	T	.	A	.	.	.	.	.	.	C	T	C	C	.	.	.	.	.	G	.	.	.	T
Strychnos mitscherlichii JF938007	-	-	-	-	.	T	.	T	.	T	C	.	.	.	.	.	.	.	.	.	.	.	-	.	.	.	T	.	A	.	.	.	.	.	.	C	T	C	C	.	.	.	.	.	G	.	.	.	T
Strychnos mostueoides JF938008	-	-	-	-	.	T	C	.	T	T	.	.	.	.	.	.	.	.	.	.	.	.	-	.	.	.	T	.	A	.	.	.	.	.	T	C	T	C	C	T	.	.	.	A	G	.	.	.	T
Strychnos nux-vomica JF938015	-	-	-	-	.	T	A	T	.	G	.	.	.	.	.	.	.	.	.	.	.	.	-	.	.	.	T	.	A	.	.	.	.	.	.	C	T	C	C	.	.	.	T	.	G	.	.	.	T
Strychnos nux-vomica JX856499	-	-	-	-	.	T	A	.	.	G	C	.	.	.	.	.	.	.	.	.	.	.	-	.	.	.	T	.	A	.	.	.	.	.	.	C	T	C	A	.	.	.	.	.	G	.	.	.	T
Strychnos oiapocensis JF938016	-	-	-	-	.	T	.	T	.	T	C	.	.	.	.	.	.	.	.	.	.	.	-	.	.	.	T	.	A	.	.	.	.	.	.	C	T	C	C	.	.	.	.	.	G	.	.	.	T
Strychnos potatorum JF938027	-	-	-	-	.	T	G	.	.	G	C	.	.	.	.	.	.	.	.	.	.	.	-	.	.	.	T	.	A	.	.	.	.	.	.	C	T	C	C	.	.	.	.	.	G	.	.	.	T
Strychnos potatorum JX856502	-	-	-	-	.	T	G	.	.	G	C	.	.	.	.	.	.	.	.	.	.	.	-	.	.	.	T	.	A	.	.	.	.	.	.	C	.	C	C	.	.	.	.	.	G	.	.	.	T
Strychnos potatorum JX856503	-	-	-	-	.	T	G	.	.	G	C	.	.	.	.	.	.	.	.	.	.	.	-	.	.	.	T	.	A	.	.	.	.	.	.	C	.	C	C	.	.	.	.	.	G	.	.	.	T
Strychnos pseudoquina JF938028	-	-	-	-	.	T	.	T	.	T	C	.	.	.	.	.	.	.	.	.	.	.	-	.	.	.	T	.	A	.	.	.	.	.	.	C	T	C	C	.	.	.	.	.	G	.	.	.	T
Strychnos spinosa JF938049	-	-	-	-	.	T	A	.	.	G	C	.	.	.	.	.	.	.	.	.	.	.	-	.	.	.	T	.	A	.	.	.	.	.	.	C	A	C	C	.	.	.	.	.	G	.	.	.	T
Ziziphus attopensis LC509596	C	.	.	C	A	C	G	.	T	C	C	.	.	.	.	C	C	.	.	.	.	A	-	.	.	.	C	.	T	A	G	.	.	.	.	C	.	.	.	.	.	.	.	.	A	.	.	.	.
Ziziphus attopensis LC509597	C	.	.	C	A	C	G	.	T	C	C	.	.	.	.	C	Y	.	.	.	.	A	-	.	.	.	C	.	T	A	G	.	.	.	.	C	.	.	.	.	.	.	.	.	A	.	.	.	.
Ziziphus attopensis LC509598	C	.	.	C	A	C	G	.	T	C	C	.	.	.	.	C	.	.	.	.	.	A	-	.	.	.	C	.	T	A	G	.	.	.	.	C	.	.	.	.	.	.	.	.	A	.	.	.	.
Ziziphus attopensis LC509599	C	.	.	C	A	C	G	.	T	C	C	.	.	.	.	C	Y	.	.	.	.	A	-	.	.	.	C	.	T	A	G	.	.	.	.	C	.	.	.	.	.	.	.	.	A	.	.	.	.
Ziziphus glabrata DQ146583	T	.	.	C	A	C	G	.	T	T	C	.	.	.	.	C	.	.	.	.	.	G	-	.	.	.	C	.	.	.	G	.	.	.	.	C	.	.	.	.	.	.	.	.	A	.	T	.	.
Ziziphus jujuba DQ146573	T	.	.	C	A	C	G	.	T	C	C	.	.	.	.	C	.	.	.	.	.	G	-	.	.	.	T	.	.	.	G	.	.	.	.	C	.	.	.	.	.	.	.	.	A	.	T	.	.
Ziziphus jujuba DQ146577	T	.	.	C	A	C	G	.	T	C	C	.	.	.	.	C	.	.	.	.	.	G	-	.	.	.	T	A	.	.	G	.	.	.	.	C	.	.	.	.	.	.	.	.	A	.	T	.	.
Ziziphus mauritiana DQ146588	T	.	.	C	R	C	G	.	T	T	C	.	.	.	.	C	.	.	.	.	.	G	-	.	.	.	C	.	.	.	G	.	.	.	.	C	.	.	.	.	.	.	.	.	A	.	T	.	.
Ziziphus mauritiana DQ146589	T	.	.	C	G	C	G	.	T	T	C	.	.	.	.	C	.	.	.	.	.	G	-	.	.	.	C	.	.	.	G	.	.	.	.	C	.	.	.	.	.	.	.	.	A	.	T	.	.
Ziziphus mucronata DQ146592	T	.	.	C	A	C	G	.	T	C	C	.	.	.	.	C	.	.	.	.	T	G	-	.	.	.	T	.	.	.	G	.	.	.	.	C	.	.	.	.	.	.	.	.	A	.	T	.	.
Ziziphus mucronata DQ146593	T	.	.	C	A	C	G	.	T	C	C	.	.	.	.	C	.	.	.	.	.	G	-	.	.	.	T	.	.	.	G	.	.	.	.	C	.	.	.	.	.	.	.	.	A	.	T	.	.
Ziziphus mucronata KR083102	T	.	.	C	A	C	G	.	T	C	C	.	.	.	.	C	.	.	.	.	T	G	-	.	.	.	T	.	.	.	G	.	.	.	.	C	.	.	.	.	.	.	.	.	A	.	T	.	.
Ziziphus oenoplia DQ146598	C	A	.	C	G	C	G	.	T	C	C	.	.	.	.	C	.	.	.	.	.	G	-	.	.	.	C	A	.	.	G	.	.	.	.	C	.	.	.	.	.	.	.	.	A	.	.	.	.
Ziziphus rugosa DQ146601	T	.	.	C	A	C	G	.	T	C	C	.	.	.	.	C	.	.	.	.	.	G	-	.	.	.	C	A	T	.	G	.	.	.	.	C	.	.	.	.	.	.	.	.	A	.	T	.	.
Ziziphus spina-christi DQ146602	T	.	.	C	A	C	G	.	T	T	C	.	.	.	.	C	.	.	.	.	.	G	-	.	.	.	C	.	.	.	G	.	.	.	.	C	.	.	.	.	.	.	.	.	A	.	T	.	.
Ziziphus spina-christi DQ146603	T	.	.	C	A	C	G	.	T	T	C	.	.	.	.	C	.	.	.	.	.	G	-	.	.	.	C	.	.	.	G	.	.	.	.	C	.	.	.	.	.	.	.	.	A	.	T	.	.
Betula alleghaniensis KT308925	G	T	-	-	-	-	-	-	-	-	-	-	-	-	-	-	-	-	-	-	-	-	-	-	-	C	C	C	G	T	C	G	T	G	C	G	T	G	C	C	G	C	G	T	C	G	C	T	C
Betula alnoides AY761101	.	.	-	-	-	-	-	-	-	-	-	-	-	-	-	-	-	-	-	-	-	-	-	-	-	.	.	.	.	.	.	.	.	.	.	.	.	.	.	.	.	.	.	.	T	.	.	.	.
Betula alnoides LC509575-87	.	.	-	-	-	-	-	-	-	-	-	-	-	-	-	-	-	-	-	-	-	-	-	-	-	.	.	.	.	.	.	.	.	.	.	.	.	.	.	.	.	T	.	.	T	.	.	.	.
Betula glandulosa AY761110	.	.	-	-	-	-	-	-	-	-	-	-	-	-	-	-	-	-	-	-	-	-	-	-	-	.	.	.	.	.	.	.	.	.	.	.	.	.	.	.	.	.	.	.	.	.	.	.	.
Betula glandulosa KT308995	.	.	-	-	-	-	-	-	-	-	-	-	-	-	-	-	-	-	-	-	-	-	-	-	-	.	.	.	.	.	.	.	.	.	.	.	.	.	A	.	.	.	.	.	.	.	.	.	.
Betula glandulosa KT309017	.	.	-	-	-	-	-	-	-	-	-	-	-	-	-	-	-	-	-	-	-	-	-	-	-	.	.	.	.	.	.	.	.	.	.	.	.	.	.	.	.	.	.	.	.	.	.	.	.
Betula lenta KT308937	.	.	-	-	-	-	-	-	-	-	-	-	-	-	-	-	-	-	-	-	-	-	-	-	-	.	.	.	.	.	.	.	.	.	.	.	.	.	.	.	.	.	.	.	.	.	.	.	.
Betula nana AY352336	.	.	-	-	-	-	-	-	-	-	-	-	-	-	-	-	-	-	-	-	-	-	-	-	-	.	.	.	.	.	.	.	.	.	.	.	.	.	.	.	.	.	.	.	.	.	.	.	.
Betula nana KT309019	.	.	-	-	-	-	-	-	-	-	-	-	-	-	-	-	-	-	-	-	-	-	-	-	-	.	.	.	.	.	.	.	.	.	.	.	.	.	A	.	.	.	.	.	.	.	.	.	.
Betula occidentalis AY761125	.	.	-	-	-	-	-	-	-	-	-	-	-	-	-	-	-	-	-	-	-	-	-	-	-	.	.	.	.	.	.	.	.	.	.	.	.	.	.	.	.	.	.	.	.	.	.	.	.
Betula papyrifera AY761126	.	.	-	-	-	-	-	-	-	-	-	-	-	-	-	-	-	-	-	-	-	-	-	-	-	.	.	.	.	.	.	.	.	.	.	.	.	.	A	.	.	.	.	.	.	.	.	.	.
Betula papyrifera KT309011	.	.	-	-	-	-	-	-	-	-	-	-	-	-	-	-	-	-	-	-	-	-	-	-	-	.	.	.	.	.	.	.	.	.	.	.	.	.	A	.	.	.	.	.	.	.	.	.	.
Betula papyrifera KT309013	.	.	-	-	-	-	-	-	-	-	-	-	-	-	-	-	-	-	-	-	-	-	-	-	-	.	.	.	.	.	.	.	.	.	.	.	.	.	.	.	.	.	.	.	.	.	.	.	.
Betula pendula AY352332	.	.	-	-	-	-	-	-	-	-	-	-	-	-	-	-	-	-	-	-	-	-	-	-	-	.	.	.	.	.	.	.	.	.	.	.	.	.	.	.	.	.	.	.	.	.	.	.	.
Betula pendula DQ499089	.	.	-	-	-	-	-	-	-	-	-	-	-	-	-	-	-	-	-	-	-	-	-	-	-	.	.	.	.	.	.	.	.	.	.	.	.	.	.	.	.	.	.	.	.	.	.	.	.
Betula pendula KT308991	.	.	-	-	-	-	-	-	-	-	-	-	-	-	-	-	-	-	-	-	-	-	-	-	-	.	.	.	.	.	.	.	.	.	.	.	.	.	.	.	.	.	.	.	.	.	.	.	.
Betula pubescens AY761130	.	.	-	-	-	-	-	-	-	-	-	-	-	-	-	-	-	-	-	-	-	-	-	-	-	.	.	.	.	.	.	.	.	.	.	.	.	.	.	.	.	.	.	.	.	.	.	.	.
Betula pubescens KT308969	.	.	-	-	-	-	-	-	-	-	-	-	-	-	-	-	-	-	-	-	-	-	-	-	-	.	.	.	.	.	.	.	.	.	.	.	.	.	.	.	.	.	.	.	.	.	.	.	.
Betula pubescens KT308972	.	.	-	-	-	-	-	-	-	-	-	-	-	-	-	-	-	-	-	-	-	-	-	-	-	.	.	.	.	.	.	.	.	.	.	.	.	.	.	.	.	.	.	.	.	.	.	.	.
Betula pubescens KT308977	.	.	-	-	-	-	-	-	-	-	-	-	-	-	-	-	-	-	-	-	-	-	-	-	-	.	.	.	.	.	.	.	.	.	.	.	.	.	.	.	.	.	.	.	.	.	.	.	.
Betula platyphylla AY761128	.	.	-	-	-	-	-	-	-	-	-	-	-	-	-	-	-	-	-	-	-	-	-	-	-	.	.	.	.	.	.	.	.	.	.	.	.	.	.	.	.	.	.	.	.	.	.	.	.
Betula pumila AJ783642	.	.	-	-	-	-	-	-	-	-	-	-	-	-	-	-	-	-	-	-	-	-	-	-	-	.	.	.	.	.	.	.	.	.	.	.	.	.	M	.	.	.	.	.	.	.	.	.	.
Betula pumila AY761131	.	.	-	-	-	-	-	-	-	-	-	-	-	-	-	-	-	-	-	-	-	-	-	-	-	.	.	.	.	.	.	.	.	.	.	.	.	.	A	.	.	.	.	.	.	.	.	.	.
Betula schmidtii AY761133	.	.	-	-	-	-	-	-	-	-	-	-	-	-	-	-	-	-	-	-	-	-	-	-	-	.	.	.	.	.	.	.	.	.	.	.	.	.	.	.	.	T	.	.	.	.	.	.	.
Strychnos aculeata JF937940	C	.	-	-	C	G	C	G	T	A	G	C	T	G	T	C	G	T	C	T	C	G	G	A	A	.	.	.	.	.	.	.	G	T	.	.	A	.	.	G	.	A	C	.	G	.	.	G	T
Strychnos afzelii JF937941	C	.	-	-	A	G	C	G	T	A	G	C	T	G	T	T	G	T	G	T	Y	G	G	A	A	.	.	.	.	.	T	.	Y	C	G	.	A	.	.	G	.	A	C	.	G	C	.	C	.
Strychnos axillaris LC509588	C	.	-	-	A	G	C	G	T	A	G	C	T	G	T	C	G	T	G	T	T	G	G	A	A	T	.	T	.	.	.	.	C	T	G	.	A	.	A	G	.	A	T	.	G	C	.	C	.
Strychnos axillaris LC509589-93	C	.	-	-	A	G	C	G	T	A	G	C	T	G	T	C	G	T	G	T	T	G	G	A	A	T	.	T	.	.	.	.	C	T	G	.	A	.	A	G	.	A	T	.	G	C	.	C	.
Strychnos axillaris LC509594	C	.	-	-	A	G	C	G	T	A	G	C	T	G	T	C	G	T	G	T	T	G	G	A	A	T	.	T	.	.	.	.	C	T	G	.	A	.	A	G	.	A	T	.	G	C	.	C	.
Strychnos axillaris LC509595	C	.	-	-	A	G	C	G	T	A	G	C	T	G	T	C	G	T	G	T	T	G	G	A	A	T	.	T	.	.	.	.	C	T	G	.	A	.	A	G	.	A	T	.	G	C	.	C	.
Strychnos camptoneura JF937958	C	.	-	-	C	G	C	G	C	G	G	C	T	G	T	C	G	T	G	T	C	G	G	A	A	.	.	.	.	.	.	.	A	T	.	.	A	.	.	G	.	A	C	.	G	C	.	G	T
Strychnos decussata JF937972	C	.	C	G	C	G	C	G	T	A	G	C	C	G	T	C	G	T	G	C	C	G	G	A	A	.	.	.	.	.	T	.	C	T	G	.	A	.	.	G	.	A	C	.	G	C	.	A	T
Strychnos dinklagei JF937973	C	.	-	-	C	G	C	A	T	A	T	C	T	G	T	C	G	T	G	T	C	G	A	A	A	.	.	.	.	.	T	.	C	T	.	.	.	.	.	G	.	A	C	.	R	C	.	G	T
Strychnos floribunda JF937981	C	.	-	-	A	G	C	G	T	A	G	C	T	G	T	C	G	T	G	T	C	G	A	A	A	.	.	A	.	.	.	.	C	T	.	.	A	.	.	G	.	A	C	.	G	C	.	G	T
Strychnos ignatii JF937986	C	.	-	-	C	G	C	A	T	G	G	C	T	G	T	C	G	T	G	T	C	G	G	A	A	.	.	.	.	.	.	.	C	T	.	.	.	.	.	G	.	A	C	.	G	C	.	G	T
Strychnos mattogrossensis JF937998	C	.	-	-	C	G	C	G	C	A	G	C	T	G	T	C	G	T	G	C	G	G	G	A	A	.	.	.	.	.	.	.	G	C	.	A	A	.	-	G	.	A	C	.	G	C	.	G	A
Strychnos minor JF938003	C	.	-	-	C	G	C	A	T	A	T	C	T	G	T	C	G	T	G	C	C	G	G	A	A	.	.	.	.	C	G	.	C	T	.	.	.	.	.	G	.	A	C	.	G	C	.	G	T
Strychnos minor JF938004	C	.	-	-	C	G	C	A	T	A	G	C	T	G	T	C	G	T	G	T	T	G	G	A	A	.	.	.	.	.	.	T	G	T	.	.	.	.	.	G	.	A	C	.	G	C	.	A	T
Strychnos minor JF938042	C	.	-	-	C	G	C	A	T	A	G	C	T	G	T	C	G	T	G	T	T	G	G	A	A	.	.	.	.	.	.	T	G	T	.	.	.	.	.	G	.	A	C	.	G	C	.	A	T
Strychnos mitscherlichii JF938006	C	.	-	-	A	G	C	G	T	A	G	A	T	G	T	C	G	T	G	T	C	G	G	A	A	.	.	.	.	.	T	.	C	C	G	.	A	.	.	G	.	A	C	C	G	C	.	C	.
Strychnos mitscherlichii JF938007	C	.	-	-	A	G	C	G	T	A	G	A	T	G	T	C	G	T	G	T	T	G	G	A	A	.	.	.	.	.	.	.	C	C	G	.	A	.	.	G	.	A	C	.	G	C	.	C	.
Strychnos mostueoides JF938008	C	.	-	-	C	G	C	G	T	A	G	C	T	G	T	C	G	T	G	T	T	G	G	A	A	G	.	.	.	.	.	.	.	T	G	.	A	.	.	A	.	A	C	.	G	C	.	C	T
Strychnos nux-vomica JF938015	C	.	-	-	C	G	C	A	T	A	G	T	T	G	T	C	G	T	G	T	T	G	G	A	A	.	.	.	.	.	.	.	.	T	.	.	A	.	.	G	.	A	C	.	G	C	.	G	T
Strychnos nux-vomica JX856499	C	.	-	-	C	G	C	A	T	A	G	C	T	G	T	C	G	T	G	T	C	G	G	A	A	.	.	.	.	.	.	.	C	T	.	.	A	.	.	G	.	A	C	.	G	C	.	G	.
Strychnos oiapocensis JF938016	C	.	-	-	A	G	C	G	T	A	G	A	T	G	T	C	G	T	G	T	C	G	G	A	C	.	.	.	.	.	T	T	.	C	G	.	A	.	.	G	.	A	C	.	G	C	.	.	.
Strychnos potatorum JF938027	C	.	-	-	C	G	C	T	T	G	G	C	T	G	T	C	G	T	G	T	C	G	G	A	A	.	T	.	.	.	.	.	C	T	T	.	A	A	.	G	.	A	C	.	G	C	.	G	T
Strychnos potatorum JX856502	C	.	-	-	A	G	C	T	T	G	G	A	T	G	T	C	G	T	G	T	C	G	G	A	A	.	T	.	.	.	.	.	G	T	T	.	A	A	.	G	.	A	C	.	G	C	G	G	T
Strychnos potatorum JX856503	C	.	-	-	A	G	C	T	T	G	G	A	T	G	T	C	G	T	G	T	C	G	G	A	A	.	T	.	.	.	.	.	G	T	T	.	A	A	.	G	.	A	C	.	G	C	.	G	T
Strychnos pseudoquina JF938028	C	.	-	-	A	G	C	G	T	A	G	A	T	G	T	C	G	T	G	T	T	G	G	A	A	.	.	.	.	.	T	.	C	C	G	.	A	.	.	G	.	A	C	.	G	C	.	.	.
Strychnos spinosa JF938049	C	.	-	-	C	G	C	A	T	G	G	C	T	G	T	Y	G	T	G	T	C	G	G	A	A	.	.	.	.	.	.	.	C	T	G	.	A	.	.	G	.	A	C	.	G	C	.	G	T
Ziziphus attopensis LC509596	A	.	-	-	-	-	-	-	-	-	-	-	-	-	-	-	-	-	-	-	-	-	-	-	C	.	.	.	.	C	T	.	C	.	T	.	C	.	.	G	.	A	T	C	G	C	.	G	.
Ziziphus attopensis LC509597	A	.	-	-	-	-	-	-	-	-	-	-	-	-	-	-	-	-	-	-	-	-	-	-	C	.	.	.	.	C	T	.	C	.	T	.	C	.	.	G	.	A	T	C	G	C	.	G	.
Ziziphus attopensis LC509598	A	.	-	-	-	-	-	-	-	-	-	-	-	-	-	-	-	-	-	-	-	-	-	-	C	.	.	.	.	C	T	.	C	.	T	.	C	.	.	G	.	A	T	C	G	C	.	G	.
Ziziphus attopensis LC509599	A	.	-	-	-	-	-	-	-	-	-	-	-	-	-	-	-	-	-	-	-	-	-	-	C	.	.	.	.	C	T	.	C	.	T	.	C	.	.	G	.	A	T	C	G	C	.	G	.
Ziziphus glabrata DQ146583	C	.	-	-	-	-	-	-	-	-	-	-	-	-	-	-	-	-	-	-	-	-	-	-	C	.	.	.	.	C	T	.	C	.	T	.	.	.	.	G	.	A	T	C	G	C	.	G	T
Ziziphus jujuba DQ146573	C	.	-	-	-	-	-	-	-	-	-	-	-	-	-	-	-	-	-	-	-	-	-	-	C	.	.	T	.	C	T	.	C	.	T	.	C	.	.	G	.	A	T	C	G	C	T	G	T
Ziziphus jujuba DQ146577	C	.	-	-	-	-	-	-	-	-	-	-	-	-	-	-	-	-	-	-	-	-	-	-	C	.	.	T	.	C	T	.	C	.	T	.	C	.	.	G	.	A	T	C	G	C	T	G	T
Ziziphus mauritiana DQ146588	C	.	-	-	-	-	-	-	-	-	-	-	-	-	-	-	-	-	-	-	-	-	-	-	C	.	.	.	.	C	T	.	C	.	T	.	.	.	.	G	.	A	T	C	G	C	.	G	T
Ziziphus mauritiana DQ146589	C	.	-	-	-	-	-	-	-	-	-	-	-	-	-	-	-	-	-	-	-	-	-	-	C	.	.	.	.	C	T	.	C	.	T	.	.	.	.	G	.	A	T	C	G	C	.	G	T
Ziziphus mucronata DQ146592	C	.	-	-	-	-	-	-	-	-	-	-	-	-	-	-	-	-	-	-	-	-	-	-	C	.	.	T	.	C	T	.	C	.	T	.	C	.	.	G	.	A	T	C	G	C	.	G	G
Ziziphus mucronata DQ146593	C	.	-	-	-	-	-	-	-	-	-	-	-	-	-	-	-	-	-	-	-	-	-	-	C	.	.	T	.	C	T	.	C	.	T	.	C	.	.	G	.	A	T	C	G	C	.	G	T
Ziziphus mucronata KR083102	C	.	-	-	-	-	-	-	-	-	-	-	-	-	-	-	-	-	-	-	-	-	-	-	C	.	.	T	.	C	T	.	C	.	T	.	C	.	.	G	.	A	T	C	G	C	.	G	T
Ziziphus oenoplia DQ146598	A	.	-	-	-	-	-	-	-	-	-	-	-	-	-	-	-	-	-	-	-	-	-	-	C	.	.	.	.	C	T	.	C	.	.	.	C	.	.	G	.	A	T	C	G	C	.	G	.
Ziziphus rugosa DQ146601	C	.	-	-	-	-	-	-	-	-	-	-	-	-	-	-	-	-	-	-	-	-	-	-	C	.	.	T	.	C	T	.	C	.	T	.	C	.	T	G	.	A	T	C	G	C	.	G	T
Ziziphus spina-christi DQ146602	C	.	-	-	-	-	-	-	-	-	-	-	-	-	-	-	-	-	-	-	-	-	-	-	C	.	.	.	.	C	T	.	C	.	T	.	.	.	.	G	.	A	T	C	G	C	.	G	T
Ziziphus spina-christi DQ146603	C	.	-	-	-	-	-	-	-	-	-	-	-	-	-	-	-	-	-	-	-	-	-	-	C	.	.	.	.	C	T	.	C	.	T	.	.	.	.	G	.	A	T	C	G	C	.	G	T
Betula alleghaniensis KT308925	-	-	-	C	C	A	G	C	-	-	-	-	-	G	A	C	G	C	-	-	-	-	-	T	T	C	C	A
Betula alnoides AY761101	-	-	-	.	T	.	.	.	-	-	-	-	-	.	.	T	.	.	-	-	-	-	-	.	.	.	.	.
Betula alnoides LC509575-87	-	-	-	.	T	.	.	.	-	-	-	-	-	.	.	T	.	.	-	-	-	-	-	.	.	.	.	.
Betula glandulosa AY761110	-	-	-	.	T	.	.	.	-	-	-	-	-	.	.	.	.	.	-	-	-	-	-	.	.	.	.	.
Betula glandulosa KT308995	-	-	-	.	T	.	.	.	-	-	-	-	-	.	.	.	.	.	-	-	-	-	-	.	.	.	.	.
Betula glandulosa KT309017	-	-	-	.	T	.	.	.	-	-	-	-	-	.	.	.	.	.	-	-	-	-	-	.	.	.	.	.
Betula lenta KT308937	-	-	-	.	T	.	.	.	-	-	-	-	-	.	.	.	.	.	-	-	-	-	-	.	.	.	.	.
Betula nana AY352336	-	-	-	.	T	.	.	.	-	-	-	-	-	.	.	.	.	.	-	-	-	-	-	.	.	.	.	.
Betula nana KT309019	-	-	-	.	T	.	.	.	-	-	-	-	-	.	.	.	.	.	-	-	-	-	-	.	.	.	.	.
Betula occidentalis AY761125	-	-	-	.	T	.	.	.	-	-	-	-	-	.	.	.	.	.	-	-	-	-	-	.	.	.	.	.
Betula papyrifera AY761126	-	-	-	.	T	.	.	.	-	-	-	-	-	.	.	.	.	.	-	-	-	-	-	.	.	.	.	.
Betula papyrifera KT309011	-	-	-	.	T	.	.	.	-	-	-	-	-	.	.	.	.	.	-	-	-	-	-	.	.	.	.	.
Betula papyrifera KT309013	-	-	-	.	T	.	.	.	-	-	-	-	-	.	.	.	.	.	-	-	-	-	-	.	.	.	.	.
Betula pendula AY352332	-	-	-	.	T	.	.	.	-	-	-	-	-	.	.	.	.	.	-	-	-	-	-	.	.	.	.	.
Betula pendula DQ499089	-	-	-	.	T	.	.	.	-	-	-	-	-	.	.	.	.	.	-	-	-	-	-	.	.	.	.	-
Betula pendula KT308991	-	-	-	.	T	.	.	.	-	-	-	-	-	.	.	.	.	.	-	-	-	-	-	.	.	.	.	.
Betula pubescens AY761130	-	-	-	.	T	.	.	.	-	-	-	-	-	.	.	.	.	.	-	-	-	-	-	.	.	.	.	.
Betula pubescens KT308969	-	-	-	.	T	.	.	.	-	-	-	-	-	.	.	.	.	.	-	-	-	-	-	.	.	.	.	.
Betula pubescens KT308972	-	-	-	.	T	.	.	.	-	-	-	-	-	.	.	.	.	.	-	-	-	-	-	.	.	.	.	.
Betula pubescens KT308977	-	-	-	.	T	.	.	.	-	-	-	-	-	.	.	.	.	.	-	-	-	-	-	.	.	.	.	.
Betula platyphylla AY761128	-	-	-	.	T	.	.	.	-	-	-	-	-	.	.	.	.	.	-	-	-	-	-	.	.	.	.	.
Betula pumila AJ783642	-	-	-	.	T	.	.	.	-	-	-	-	-	.	.	.	.	.	-	-	-	-	-	.	.	.	.	.
Betula pumila AY761131	-	-	-	.	T	.	.	.	-	-	-	-	-	.	.	.	.	.	-	-	-	-	-	.	.	.	.	.
Betula schmidtii AY761133	-	-	-	.	T	.	.	.	-	-	-	-	-	.	.	.	.	.	-	-	-	-	-	.	.	.	.	.
Strychnos aculeata JF937940	-	T	C	.	G	T	A	G	-	-	-	-	-	.	.	.	.	.	-	T	C	G	G	C	C	A	.	G
Strychnos afzelii JF937941	-	T	C	T	.	G	A	.	-	-	-	-	-	.	.	.	T	.	-	T	C	G	G	C	C	A	.	G
Strychnos axillaris LC509588	-	T	C	T	.	G	A	.	-	-	-	-	-	.	.	.	T	.	-	T	C	G	G	C	C	A	.	G
Strychnos axillaris LC509589-93	-	T	C	T	.	G	A	.	-	-	-	-	-	.	.	.	T	.	-	T	C	G	G	C	C	A	.	G
Strychnos axillaris LC509594	-	T	C	T	.	G	A	.	-	-	-	-	-	.	.	.	T	.	-	T	C	G	G	C	C	A	.	G
Strychnos axillaris LC509595	-	T	C	T	.	G	A	.	-	-	-	-	-	.	.	.	T	.	-	T	C	G	G	C	C	A	.	G
Strychnos camptoneura JF937958	T	T	C	.	.	G	A	G	-	-	-	-	-	.	G	.	.	.	-	T	C	G	G	C	C	A	.	G
Strychnos decussata JF937972	-	T	C	.	A	G	A	G	-	-	-	-	-	.	.	.	.	.	-	T	C	G	C	C	C	A	.	G
Strychnos dinklagei JF937973	-	-	-	T	.	.	T	.	T	C	T	T	T	.	.	.	.	.	-	T	C	G	G	C	A	A	.	G
Strychnos floribunda JF937981	-	T	C	.	G	T	T	G	-	-	-	-	-	.	.	.	.	.	-	T	C	G	G	C	C	A	.	G
Strychnos ignatii JF937986	-	T	C	.	.	G	C	G	-	-	-	-	-	.	.	.	.	T	-	T	C	G	G	C	C	A	.	G
Strychnos mattogrossensis JF937998	C	C	C	T	.	G	-	-	-	-	-	-	-	.	.	.	.	.	-	T	C	G	G	C	C	A	.	G
Strychnos minor JF938003	-	T	C	T	.	C	T	T	-	-	-	-	-	.	G	.	.	.	-	T	A	G	G	C	.	A	.	G
Strychnos minor JF938004	-	T	C	T	.	T	T	T	-	-	-	-	-	.	.	T	.	.	-	T	C	G	G	C	C	.	.	G
Strychnos minor JF938042	-	-	T	.	T	C	T	T	-	-	-	-	-	.	.	T	.	.	-	T	C	G	G	C	C	.	.	G
Strychnos mitscherlichii JF938006	-	T	C	T	.	G	A	.	-	-	-	-	-	.	.	.	T	.	-	T	C	G	G	C	C	A	.	R
Strychnos mitscherlichii JF938007	-	T	C	T	.	G	A	.	-	-	-	-	-	.	.	.	T	.	-	T	C	G	G	C	C	A	.	G
Strychnos mostueoides JF938008	-	T	C	T	.	G	A	.	-	-	-	-	-	.	.	.	T	.	-	T	C	G	A	C	C	T	.	T
Strychnos nux-vomica JF938015	-	T	C	.	.	G	T	G	-	-	-	-	-	D	.	.	.	.	-	T	C	G	G	C	C	A	.	G
Strychnos nux-vomica JX856499	-	T	C	.	.	G	A	G	-	-	-	-	-	.	.	.	.	.	-	T	C	G	G	C	C	A	.	G
Strychnos oiapocensis JF938016	-	T	C	T	.	G	A	.	-	-	-	-	-	.	.	.	T	.	-	T	C	G	G	C	.	A	.	G
Strychnos potatorum JF938027	-	T	C	.	.	T	.	G	-	-	-	-	-	.	.	.	.	.	-	T	C	G	G	C	C	T	.	G
Strychnos potatorum JX856502	-	T	C	.	.	T	.	G	-	-	-	-	-	.	.	.	.	.	-	T	C	G	A	C	C	.	.	G
Strychnos potatorum JX856503	-	T	C	.	.	T	.	G	-	-	-	-	-	.	.	.	.	.	-	T	C	G	A	C	C	.	.	G
Strychnos pseudoquina JF938028	-	T	C	T	.	G	A	.	-	-	-	-	-	.	.	.	T	.	-	T	C	G	G	C	C	A	.	G
Strychnos spinosa JF938049	-	T	C	.	.	T	C	G	-	-	-	-	-	.	.	.	.	.	-	T	G	G	G	C	C	A	.	G
Ziziphus attopensis LC509596	-	-	-	.	.	.	.	.	-	-	-	-	-	.	G	.	.	T	-	-	-	-	-	C	.	A	.	.
Ziziphus attopensis LC509597	-	-	-	.	.	.	.	.	-	-	-	-	-	.	G	.	.	T	-	-	-	-	-	C	.	A	.	.
Ziziphus attopensis LC509598	-	-	-	.	.	.	.	.	-	-	-	-	-	.	G	.	.	T	-	-	-	-	-	C	.	A	.	.
Ziziphus attopensis LC509599	-	-	-	.	.	.	.	.	-	-	-	-	-	.	G	.	.	T	-	-	-	-	-	C	.	A	.	.
Ziziphus glabrata DQ146583	-	-	-	-	-	-	-	-	-	-	-	-	-	.	.	T	.	.	G	G	C	G	T	C	.	.	.	.
Ziziphus jujuba DQ146573	-	-	-	-	-	-	-	-	-	-	-	-	-	A	.	T	.	.	G	G	C	G	T	C	.	.	.	.
Ziziphus jujuba DQ146577	-	-	-	-	-	-	-	-	-	-	-	-	-	A	.	T	.	.	G	G	C	G	T	C	.	.	.	.
Ziziphus mauritiana DQ146588	-	-	-	-	-	-	-	-	-	-	-	-	-	.	.	T	.	.	G	G	C	G	T	C	.	.	.	.
Ziziphus mauritiana DQ146589	-	-	-	-	-	-	-	-	-	-	-	-	-	.	.	T	.	.	G	G	C	G	T	C	.	.	.	.
Ziziphus mucronata DQ146592	-	-	-	-	-	-	-	-	-	-	-	-	-	.	G	T	.	.	G	G	C	G	T	C	.	.	.	.
Ziziphus mucronata DQ146593	-	-	-	-	-	-	-	-	-	-	-	-	-	.	G	T	.	.	G	G	C	G	T	C	.	.	.	.
Ziziphus mucronata KR083102	-	-	-	.	.	G	C	.	-	-	-	-	-	.	G	T	.	.	G	G	C	G	T	C	.	.	.	.
Ziziphus oenoplia DQ146598	-	-	-	.	G	.	.	.	-	-	-	-	-	.	G	.	.	T	-	-	-	-	-	C	.	.	G	.
Ziziphus rugosa DQ146601	-	-	-	-	-	-	-	-	-	-	-	-	-	.	G	T	.	.	G	G	C	G	T	C	.	A	.	.
Ziziphus spina-christi DQ146602	-	-	-	-	-	-	-	-	-	-	-	-	-	.	.	T	.	.	G	G	C	G	T	C	.	.	.	.
Ziziphus spina-christi DQ146603	-	-	-	-	-	-	-	-	-	-	-	-	-	.	.	T	.	.	G	G	C	G	T	C	.	.	.	.
[truncated: 31 more columns]
