# Supplementary material for: Verification of Thai ethnobotanical medicine “Kamlang Suea Khrong” driven by multiplex PCR and powerful TLC techniques
Source: PLOS journal article supplement (doi:10.1371/journal.pone.0257243), 2021-09-17
Supplement: S2 (10.1371/journal.pone.0257243.s002) [file journal.pone.0257243.s002]

## Authentic KSK crude drugs

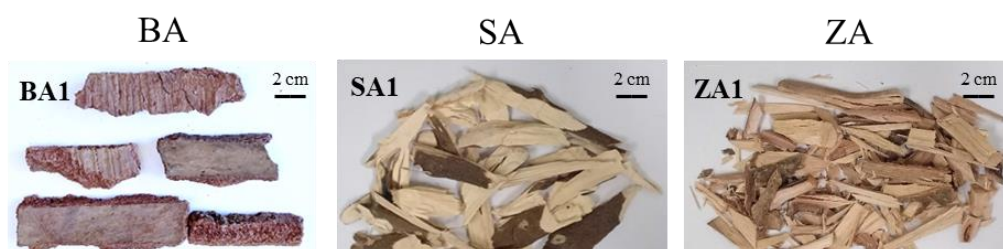

## Commercial KSK crude drugs

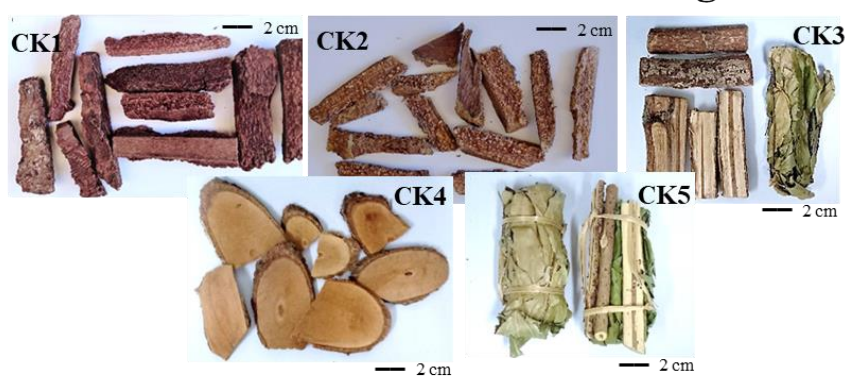

**S2 Fig. KSK crude drugs used in this study.**
