# Supplementary material for: Verification of Thai ethnobotanical medicine “Kamlang Suea Khrong” driven by multiplex PCR and powerful TLC techniques
Source: PLOS journal article supplement (doi:10.1371/journal.pone.0257243), 2021-09-17
Supplement: S3 (10.1371/journal.pone.0257243.s003) [file journal.pone.0257243.s003]

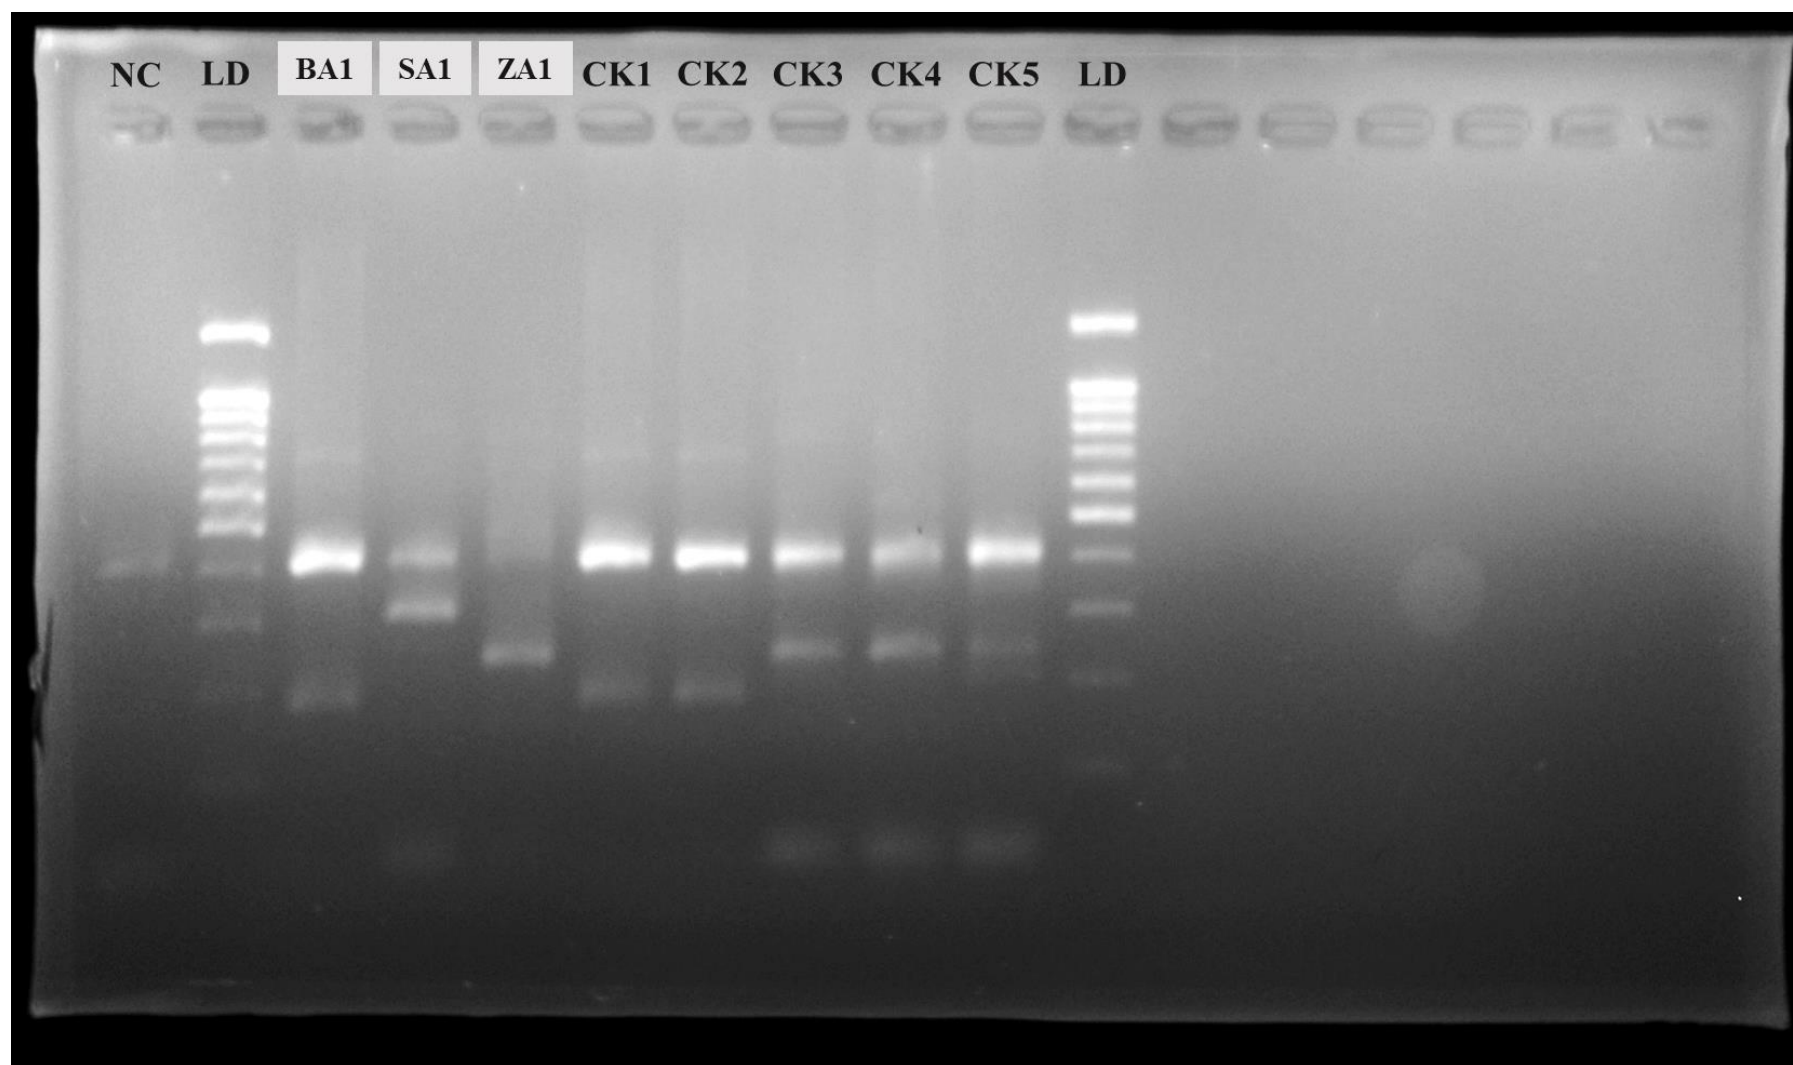

**S3 Fig.** The original image of the amplicons from multiplex PCR represented in Figure 6A.
