# Supplementary material for: Verification of Thai ethnobotanical medicine “Kamlang Suea Khrong” driven by multiplex PCR and powerful TLC techniques
Source: PLoS One. 2021 Sep 17;16(9):e0257243. doi: 10.1371/journal.pone.0257243 (PMC8448358; doi:10.1371/journal.pone.0257243)
Supplement: S3 Spreadsheet — (XLSX) [file pone.0257243.s009.xlsx]

## Sheet: ITS 
S3 Spreadsheet. ITS sequence alignment of the authentic samples.
Domain: Data
Betula alnoides LC509575	T	C	G	A	A	A	C	C	T	G	C	C	C	A	G	C	A	G	A	A	C	G	A	C	C	C	G	T	G	A	A	C	C	T	G	T	T	G	A	A	A	C	A	A	C	T	G	G	G
Betula alnoides LC509576	.	.	.	.	.	.	.	.	.	.	.	.	.	.	.	.	.	.	.	.	.	.	.	.	.	.	.	.	.	.	.	.	.	.	.	.	.	.	.	.	.	.	.	.	.	.	.	.	.
Betula alnoides LC509577	.	.	.	.	.	.	.	.	.	.	.	.	.	.	.	.	.	.	.	.	.	.	.	.	.	.	.	.	.	.	.	.	.	.	.	.	.	.	.	.	.	.	.	.	.	.	.	.	.
Betula alnoides LC509578	.	.	.	.	.	.	.	.	.	.	.	.	.	.	.	.	.	.	.	.	.	.	.	.	.	.	.	.	.	.	.	.	.	.	.	.	.	.	.	.	.	.	.	.	.	.	.	.	.
Betula alnoides LC509579	.	.	.	.	.	.	.	.	.	.	.	.	.	.	.	.	.	.	.	.	.	.	.	.	.	.	.	.	.	.	.	.	.	.	.	.	.	.	.	.	.	.	.	.	.	.	.	.	.
Betula alnoides LC509580	.	.	.	.	.	.	.	.	.	.	.	.	.	.	.	.	.	.	.	.	.	.	.	.	.	.	.	.	.	.	.	.	.	.	.	.	.	.	.	.	.	.	.	.	.	.	.	.	.
Betula alnoides LC509581	.	.	.	.	.	.	.	.	.	.	.	.	.	.	.	.	.	.	.	.	.	.	.	.	.	.	.	.	.	.	.	.	.	.	.	.	.	.	.	.	.	.	.	.	.	.	.	.	.
Betula alnoides LC509582	.	.	.	.	.	.	.	.	.	.	.	.	.	.	.	.	.	.	.	.	.	.	.	.	.	.	.	.	.	.	.	.	.	.	.	.	.	.	.	.	.	.	.	.	.	.	.	.	.
Betula alnoides LC509583	.	.	.	.	.	.	.	.	.	.	.	.	.	.	.	.	.	.	.	.	.	.	.	.	.	.	.	.	.	.	.	.	.	.	.	.	.	.	.	.	.	.	.	.	.	.	.	.	.
Betula alnoides LC509584	.	.	.	.	.	.	.	.	.	.	.	.	.	.	.	.	.	.	.	.	.	.	.	.	.	.	.	.	.	.	.	.	.	.	.	.	.	.	.	.	.	.	.	.	.	.	.	.	.
Betula alnoides LC509585	.	.	.	.	.	.	.	.	.	.	.	.	.	.	.	.	.	.	.	.	.	.	.	.	.	.	.	.	.	.	.	.	.	.	.	.	.	.	.	.	.	.	.	.	.	.	.	.	.
Betula alnoides LC509586	.	.	.	.	.	.	.	.	.	.	.	.	.	.	.	.	.	.	.	.	.	.	.	.	.	.	.	.	.	.	.	.	.	.	.	.	.	.	.	.	.	.	.	.	.	.	.	.	.
Betula alnoides LC509587	.	.	.	.	.	.	.	.	.	.	.	.	.	.	.	.	.	.	.	.	.	.	.	.	.	.	.	.	.	.	.	.	.	.	.	.	.	.	.	.	.	.	.	.	.	.	.	.	.
Strychnos axillaris LC509588	A	.	.	.	.	T	.	.	.	.	.	A	G	.	C	G	.	C	C	C	G	C	G	A	A	.	A	C	.	T	T	T	.	.	A	C	G	C	C	C	.	.	G	G	G	C	.	T	C
Strychnos axillaris LC509589	A	.	.	.	.	T	.	.	.	.	.	A	G	.	C	G	.	C	C	C	G	C	G	A	A	.	A	C	.	T	T	T	.	.	A	C	G	C	C	C	.	.	G	G	G	C	.	T	C
Strychnos axillaris LC509590	A	.	.	.	.	T	.	.	.	.	.	A	G	.	C	G	.	C	C	C	G	C	G	A	A	.	A	C	.	T	T	T	.	.	A	C	G	C	C	C	.	.	G	G	G	C	.	T	C
Strychnos axillaris LC509591	A	.	.	.	.	T	.	.	.	.	.	A	G	.	C	G	.	C	C	C	G	C	G	A	A	.	A	C	.	T	T	T	.	.	A	C	G	C	C	C	.	.	G	G	G	C	.	T	C
Strychnos axillaris LC509592	A	.	.	.	.	T	.	.	.	.	.	A	G	.	C	G	.	C	C	C	G	C	G	A	A	.	A	C	.	T	T	T	.	.	A	C	G	C	C	C	.	.	G	G	G	C	.	T	C
Strychnos axillaris LC509593	A	.	.	.	.	T	.	.	.	.	.	A	G	.	C	G	.	C	C	C	G	C	G	A	A	.	A	C	.	T	T	T	.	.	A	C	G	C	C	C	.	.	G	G	G	C	.	T	C
Strychnos axillaris LC509594	A	.	.	.	.	T	.	.	.	.	.	A	G	.	C	G	.	C	C	C	G	C	G	A	A	.	A	C	.	T	T	T	.	.	A	C	G	C	C	C	.	.	G	G	G	C	.	T	C
Strychnos axillaris LC509595	A	.	.	.	.	T	.	.	.	.	.	A	G	.	C	G	.	C	C	C	G	C	G	A	A	.	A	C	.	T	T	T	.	.	A	C	G	C	C	C	.	.	G	G	G	C	.	T	C
Ziziphus attopensis LC509596	.	.	.	.	.	.	.	.	.	.	.	.	.	.	.	.	.	.	.	.	.	.	.	.	.	G	.	C	.	.	.	.	.	C	.	.	A	A	.	.	.	A	C	.	.	A	C	C	.
Ziziphus attopensis LC509597	.	.	.	.	.	.	.	.	.	.	.	.	.	.	.	.	.	.	.	.	.	.	.	.	.	G	.	C	.	.	.	.	.	C	.	.	A	A	.	.	.	A	C	.	.	A	C	C	.
Ziziphus attopensis LC509598	.	.	.	.	.	.	.	.	.	.	.	.	.	.	.	.	.	.	.	.	.	.	.	.	.	G	.	C	.	.	.	.	.	C	.	.	A	A	.	.	.	A	C	.	.	A	C	C	.
Ziziphus attopensis LC509599	.	.	.	.	.	.	.	.	.	.	.	.	.	.	.	.	.	.	.	.	.	.	.	.	.	G	.	C	.	.	.	.	.	C	.	.	A	A	.	.	.	A	C	.	.	A	C	C	.
Betula alnoides LC509575	A	C	G	G	T	A	G	G	G	A	G	A	C	A	C	T	C	G	T	G	C	A	T	C	C	C	T	G	C	C	G	A	A	C	A	A	C	G	A	A	C	C	C	C	G	G	C	G	C
Betula alnoides LC509576	.	.	.	.	.	.	.	.	.	.	.	.	.	.	.	.	.	.	.	.	.	.	.	.	.	.	.	.	.	.	.	.	.	.	.	.	.	.	.	.	.	.	.	.	.	.	.	.	.
Betula alnoides LC509577	.	.	.	.	.	.	.	.	.	.	.	.	.	.	.	.	.	.	.	.	.	.	.	.	.	.	.	.	.	.	.	.	.	.	.	.	.	.	.	.	.	.	.	.	.	.	.	.	.
Betula alnoides LC509578	.	.	.	.	.	.	.	.	.	.	.	.	.	.	.	.	.	.	.	.	.	.	.	.	.	.	.	.	.	.	.	.	.	.	.	.	.	.	.	.	.	.	.	.	.	.	.	.	.
Betula alnoides LC509579	.	.	.	.	.	.	.	.	.	.	.	.	.	.	.	.	.	.	.	.	.	.	.	.	.	.	.	.	.	.	.	.	.	.	.	.	.	.	.	.	.	.	.	.	.	.	.	.	.
Betula alnoides LC509580	.	.	.	.	.	.	.	.	.	.	.	.	.	.	.	.	.	.	.	.	.	.	.	.	.	.	.	.	.	.	.	.	.	.	.	.	.	.	.	.	.	.	.	.	.	.	.	.	.
Betula alnoides LC509581	.	.	.	.	.	.	.	.	.	.	.	.	.	.	.	.	.	.	.	.	.	.	.	.	.	.	.	.	.	.	.	.	.	.	.	.	.	.	.	.	.	.	.	.	.	.	.	.	.
Betula alnoides LC509582	.	.	.	.	.	.	.	.	.	.	.	.	.	.	.	.	.	.	.	.	.	.	.	.	.	.	.	.	.	.	.	.	.	.	.	.	.	.	.	.	.	.	.	.	.	.	.	.	.
Betula alnoides LC509583	.	.	.	.	.	.	.	.	.	.	.	.	.	.	.	.	.	.	.	.	.	.	.	.	.	.	.	.	.	.	.	.	.	.	.	.	.	.	.	.	.	.	.	.	.	.	.	.	.
Betula alnoides LC509584	.	.	.	.	.	.	.	.	.	.	.	.	.	.	.	.	.	.	.	.	.	.	.	.	.	.	.	.	.	.	.	.	.	.	.	.	.	.	.	.	.	.	.	.	.	.	.	.	.
Betula alnoides LC509585	.	.	.	.	.	.	.	.	.	.	.	.	.	.	.	.	.	.	.	.	.	.	.	.	.	.	.	.	.	.	.	.	.	.	.	.	.	.	.	.	.	.	.	.	.	.	.	.	.
Betula alnoides LC509586	.	.	.	.	.	.	.	.	.	.	.	.	.	.	.	.	.	.	.	.	.	.	.	.	.	.	.	.	.	.	.	.	.	.	.	.	.	.	.	.	.	.	.	.	.	.	.	.	.
Betula alnoides LC509587	.	.	.	.	.	.	.	.	.	.	.	.	.	.	.	.	.	.	.	.	.	.	.	.	.	.	.	.	.	.	.	.	.	.	.	.	.	.	.	.	.	.	.	.	.	.	.	.	.
Strychnos axillaris LC509588	C	G	C	.	A	G	C	.	.	C	C	C	G	C	G	C	.	C	.	C	G	G	G	T	G	.	.	T	G	G	C	C	G	A	G	C	G	C	.	.	A	.	A	A	C	.	A	A	.
Strychnos axillaris LC509589	C	G	C	.	A	G	C	.	.	C	C	C	G	C	G	C	.	C	.	C	G	G	G	T	G	.	.	T	G	G	C	C	G	A	G	C	G	C	.	.	A	.	A	A	C	.	A	A	.
Strychnos axillaris LC509590	C	G	C	.	A	G	C	.	.	C	C	C	G	C	G	C	.	C	.	C	G	G	G	T	G	.	.	T	G	G	C	C	G	A	G	C	G	C	.	.	A	.	A	A	C	.	A	A	.
Strychnos axillaris LC509591	C	G	C	.	A	G	C	.	.	C	C	C	G	C	G	C	.	C	.	C	G	G	G	T	G	.	.	T	G	G	C	C	G	A	G	C	G	C	.	.	A	.	A	A	C	.	A	A	.
Strychnos axillaris LC509592	C	G	C	.	A	G	C	.	.	C	C	C	G	C	G	C	.	C	.	C	G	G	G	T	G	.	.	T	G	G	C	C	G	A	G	C	G	C	.	.	A	.	A	A	C	.	A	A	.
Strychnos axillaris LC509593	C	G	C	.	A	G	C	.	.	C	C	C	G	C	G	C	.	C	.	C	G	G	G	T	G	.	.	T	G	G	C	C	G	A	G	C	G	C	.	.	A	.	A	A	C	.	A	A	.
Strychnos axillaris LC509594	C	G	C	.	A	G	C	.	.	C	C	C	G	C	G	C	.	C	.	C	G	G	G	T	G	.	.	T	G	G	C	C	G	A	G	C	G	C	.	.	A	.	A	A	C	.	A	A	.
Strychnos axillaris LC509595	C	G	C	.	A	G	C	.	.	C	C	C	G	C	G	C	.	C	.	C	G	G	G	T	G	.	.	T	G	G	C	C	G	A	G	C	G	C	.	.	A	.	A	A	C	.	A	A	.
Ziziphus attopensis LC509596	C	T	C	T	.	C	.	.	T	C	.	G	G	G	G	G	.	C	G	C	A	T	C	.	.	G	.	.	.	.	T	C	G	.	C	C	G	T	C	G	A	T	G	.	.	C	G	.	T
Ziziphus attopensis LC509597	C	T	C	T	.	C	.	.	T	C	.	G	G	G	G	G	.	C	G	C	A	T	C	.	.	G	W	.	.	.	T	C	G	.	C	C	G	T	C	G	A	T	G	.	.	C	G	.	T
Ziziphus attopensis LC509598	C	T	C	T	.	C	.	.	T	C	.	G	G	G	G	G	.	C	G	C	A	T	C	.	.	G	.	.	.	.	T	C	G	.	C	C	G	T	C	G	A	T	G	.	.	C	G	.	T
Ziziphus attopensis LC509599	C	T	C	T	.	C	.	.	T	C	.	G	G	G	G	G	.	C	G	C	A	T	C	.	.	G	.	.	.	.	T	C	G	.	C	C	G	T	C	G	A	T	G	.	.	C	G	.	T
Betula alnoides LC509575	G	C	C	T	C	C	G	G	C	C	G	C	C	T	C	G	G	A	A	A	C	G	G	T	G	T	G	C	G	T	G	C	G	G	G	A	G	G	T	G	A	A	T	C	T	T	G	T	C
Betula alnoides LC509576	.	.	.	.	.	.	.	.	.	.	.	.	.	.	.	.	.	.	.	.	.	.	.	.	.	.	.	.	.	.	.	.	.	.	.	.	.	.	.	.	.	.	.	.	.	.	.	.	.
Betula alnoides LC509577	.	.	.	.	.	.	.	.	.	.	.	.	.	.	.	.	.	.	.	.	.	.	.	.	.	.	.	.	.	.	.	.	.	.	.	.	.	.	.	.	.	.	.	.	.	.	.	.	.
Betula alnoides LC509578	.	.	.	.	.	.	.	.	.	.	.	.	.	.	.	.	.	.	.	.	.	.	.	.	.	.	.	.	.	.	.	.	.	.	.	.	.	.	.	.	.	.	.	.	.	.	.	.	.
Betula alnoides LC509579	.	.	.	.	.	.	.	.	.	.	.	.	.	.	.	.	.	.	.	.	.	.	.	.	.	.	.	.	.	.	.	.	.	.	.	.	.	.	.	.	.	.	.	.	.	.	.	.	.
Betula alnoides LC509580	.	.	.	.	.	.	.	.	.	.	.	.	.	.	.	.	.	.	.	.	.	.	.	.	.	.	.	.	.	.	.	.	.	.	.	.	.	.	.	.	.	.	.	.	.	.	.	.	.
Betula alnoides LC509581	.	.	.	.	.	.	.	.	.	.	.	.	.	.	.	.	.	.	.	.	.	.	.	.	.	.	.	.	.	.	.	.	.	.	.	.	.	.	.	.	.	.	.	.	.	.	.	.	.
Betula alnoides LC509582	.	.	.	.	.	.	.	.	.	.	.	.	.	.	.	.	.	.	.	.	.	.	.	.	.	.	.	.	.	.	.	.	.	.	.	.	.	.	.	.	.	.	.	.	.	.	.	.	.
Betula alnoides LC509583	.	.	.	.	.	.	.	.	.	.	.	.	.	.	.	.	.	.	.	.	.	.	.	.	.	.	.	.	.	.	.	.	.	.	.	.	.	.	.	.	.	.	.	.	.	.	.	.	.
Betula alnoides LC509584	.	.	.	.	.	.	.	.	.	.	.	.	.	.	.	.	.	.	.	.	.	.	.	.	.	.	.	.	.	.	.	.	.	.	.	.	.	.	.	.	.	.	.	.	.	.	.	.	.
Betula alnoides LC509585	.	.	.	.	.	.	.	.	.	.	.	.	.	.	.	.	.	.	.	.	.	.	.	.	.	.	.	.	.	.	.	.	.	.	.	.	.	.	.	.	.	.	.	.	.	.	.	.	.
Betula alnoides LC509586	.	.	.	.	.	.	.	.	.	.	.	.	.	.	.	.	.	.	.	.	.	.	.	.	.	.	.	.	.	.	.	.	.	.	.	.	.	.	.	.	.	.	.	.	.	.	.	.	.
Betula alnoides LC509587	.	.	.	.	.	.	.	.	.	.	.	.	.	.	.	.	.	.	.	.	.	.	.	.	.	.	.	.	.	.	.	.	.	.	.	.	.	.	.	.	.	.	.	.	.	.	.	.	.
Strychnos axillaris LC509588	A	.	A	G	A	T	A	.	.	.	T	G	.	C	.	T	.	C	C	T	T	.	C	C	C	C	.	T	T	C	.	.	.	.	T	G	C	.	C	T	G	G	G	G	G	G	.	C	G
Strychnos axillaris LC509589	A	.	A	G	A	T	A	.	.	.	T	G	.	C	.	T	.	C	C	Y	T	.	C	C	C	C	.	T	T	C	.	.	.	.	T	G	C	.	C	T	G	G	G	G	G	G	.	C	G
Strychnos axillaris LC509590	A	.	A	G	A	T	A	.	.	.	T	G	.	C	.	T	.	C	C	Y	T	.	C	C	C	C	.	T	T	C	.	.	.	.	T	G	C	.	C	T	G	G	G	G	G	G	.	C	G
Strychnos axillaris LC509591	A	.	A	G	A	T	A	.	.	.	T	G	.	C	.	T	.	C	C	Y	T	.	C	C	C	C	.	T	T	C	.	.	.	.	T	G	C	.	C	T	G	G	G	G	G	G	.	C	G
Strychnos axillaris LC509592	A	.	A	G	A	T	A	.	.	.	T	G	.	C	.	T	.	C	C	Y	T	.	C	C	C	C	.	T	T	C	.	.	.	.	T	G	C	.	C	T	G	G	G	G	G	G	.	C	G
Strychnos axillaris LC509593	A	.	A	G	A	T	A	.	.	.	T	G	.	C	.	T	.	C	C	Y	T	.	C	C	C	C	.	T	T	C	.	.	.	.	T	G	C	.	C	T	G	G	G	G	G	G	.	C	G
Strychnos axillaris LC509594	A	.	A	G	A	T	A	.	.	.	T	G	.	C	.	T	.	C	C	Y	T	.	C	C	C	C	.	T	T	C	.	.	.	.	T	G	C	.	C	T	G	G	G	G	G	G	.	C	G
Strychnos axillaris LC509595	A	.	A	G	A	T	A	.	.	.	T	G	.	C	.	T	.	C	C	C	T	.	C	C	C	C	.	T	T	C	.	.	.	.	T	G	C	.	C	T	G	G	G	G	G	G	.	C	G
Ziziphus attopensis LC509596	.	G	.	G	.	A	A	A	.	.	.	.	G	C	.	A	A	G	G	.	A	C	A	C	C	.	A	A	C	G	A	A	T	T	.	G	C	A	.	T	C	.	C	.	C	C	C	C	G
Ziziphus attopensis LC509597	.	G	.	G	.	A	A	A	.	.	.	.	G	C	.	A	A	G	G	.	A	C	A	C	C	.	A	A	C	G	A	A	T	T	.	G	C	A	.	T	C	.	C	.	C	C	C	C	G
Ziziphus attopensis LC509598	.	G	.	G	.	A	A	A	.	.	.	.	G	C	.	A	A	G	G	.	A	C	A	C	C	.	A	A	C	G	A	A	T	T	.	G	C	A	.	T	C	.	C	.	C	C	C	C	G
Ziziphus attopensis LC509599	.	G	.	G	.	A	A	A	.	.	.	.	G	C	.	A	A	G	G	.	A	C	A	C	C	.	A	A	C	G	A	A	T	T	.	G	C	A	.	T	C	.	C	.	C	C	C	C	G
Betula alnoides LC509575	C	T	C	G	G	C	T	C	T	C	G	C	A	T	C	G	A	T	G	A	A	G	A	A	C	G	T	A	G	C	G	A	A	A	T	G	C	G	A	T	A	C	T	T	G	G	T	G	T
Betula alnoides LC509576	.	.	.	.	.	.	.	.	.	.	.	.	.	.	.	.	.	.	.	.	.	.	.	.	.	.	.	.	.	.	.	.	.	.	.	.	.	.	.	.	.	.	.	.	.	.	.	.	.
Betula alnoides LC509577	.	.	.	.	.	.	.	.	.	.	.	.	.	.	.	.	.	.	.	.	.	.	.	.	.	.	.	.	.	.	.	.	.	.	.	.	.	.	.	.	.	.	.	.	.	.	.	.	.
Betula alnoides LC509578	.	.	.	.	.	.	.	.	.	.	.	.	.	.	.	.	.	.	.	.	.	.	.	.	.	.	.	.	.	.	.	.	.	.	.	.	.	.	.	.	.	.	.	.	.	.	.	.	.
Betula alnoides LC509579	.	.	.	.	.	.	.	.	.	.	.	.	.	.	.	.	.	.	.	.	.	.	.	.	.	.	.	.	.	.	.	.	.	.	.	.	.	.	.	.	.	.	.	.	.	.	.	.	.
Betula alnoides LC509580	.	.	.	.	.	.	.	.	.	.	.	.	.	.	.	.	.	.	.	.	.	.	.	.	.	.	.	.	.	.	.	.	.	.	.	.	.	.	.	.	.	.	.	.	.	.	.	.	.
Betula alnoides LC509581	.	.	.	.	.	.	.	.	.	.	.	.	.	.	.	.	.	.	.	.	.	.	.	.	.	.	.	.	.	.	.	.	.	.	.	.	.	.	.	.	.	.	.	.	.	.	.	.	.
Betula alnoides LC509582	.	.	.	.	.	.	.	.	.	.	.	.	.	.	.	.	.	.	.	.	.	.	.	.	.	.	.	.	.	.	.	.	.	.	.	.	.	.	.	.	.	.	.	.	.	.	.	.	.
Betula alnoides LC509583	.	.	.	.	.	.	.	.	.	.	.	.	.	.	.	.	.	.	.	.	.	.	.	.	.	.	.	.	.	.	.	.	.	.	.	.	.	.	.	.	.	.	.	.	.	.	.	.	.
Betula alnoides LC509584	.	.	.	.	.	.	.	.	.	.	.	.	.	.	.	.	.	.	.	.	.	.	.	.	.	.	.	.	.	.	.	.	.	.	.	.	.	.	.	.	.	.	.	.	.	.	.	.	.
Betula alnoides LC509585	.	.	.	.	.	.	.	.	.	.	.	.	.	.	.	.	.	.	.	.	.	.	.	.	.	.	.	.	.	.	.	.	.	.	.	.	.	.	.	.	.	.	.	.	.	.	.	.	.
Betula alnoides LC509586	.	.	.	.	.	.	.	.	.	.	.	.	.	.	.	.	.	.	.	.	.	.	.	.	.	.	.	.	.	.	.	.	.	.	.	.	.	.	.	.	.	.	.	.	.	.	.	.	.
Betula alnoides LC509587	.	.	.	.	.	.	.	.	.	.	.	.	.	.	.	.	.	.	.	.	.	.	.	.	.	.	.	.	.	.	.	.	.	.	.	.	.	.	.	.	.	.	.	.	.	.	.	.	.
Strychnos axillaris LC509588	G	G	.	A	A	.	G	G	A	T	A	T	C	.	.	.	G	C	T	C	T	C	G	C	A	T	C	G	A	T	.	.	.	G	A	A	.	.	T	A	G	.	A	A	A	C	.	.	C
Strychnos axillaris LC509589	G	G	.	A	A	.	G	G	A	T	A	T	C	.	.	.	G	C	T	C	T	C	G	C	A	T	C	G	A	T	.	.	.	G	A	A	.	.	T	A	G	.	A	A	A	C	.	.	C
Strychnos axillaris LC509590	G	G	.	A	A	.	G	G	A	T	A	T	C	.	.	.	G	C	T	C	T	C	G	C	A	T	C	G	A	T	.	.	.	G	A	A	.	.	T	A	G	.	A	A	A	C	.	.	C
Strychnos axillaris LC509591	G	G	.	A	A	.	G	G	A	T	A	T	C	.	.	.	G	C	T	C	T	C	G	C	A	T	C	G	A	T	.	.	.	G	A	A	.	.	T	A	G	.	A	A	A	C	.	.	C
Strychnos axillaris LC509592	G	G	.	A	A	.	G	G	A	T	A	T	C	.	.	.	G	C	T	C	T	C	G	C	A	T	C	G	A	T	.	.	.	G	A	A	.	.	T	A	G	.	A	A	A	C	.	.	C
Strychnos axillaris LC509593	G	G	.	A	A	.	G	G	A	T	A	T	C	.	.	.	G	C	T	C	T	C	G	C	A	T	C	G	A	T	.	.	.	G	A	A	.	.	T	A	G	.	A	A	A	C	.	.	C
Strychnos axillaris LC509594	G	G	.	A	A	.	G	G	A	T	A	T	C	.	.	.	G	C	T	C	T	C	G	C	A	T	C	G	A	T	.	.	.	G	A	A	.	.	T	A	G	.	A	A	A	C	.	.	C
Strychnos axillaris LC509595	G	G	.	A	A	.	G	G	A	T	A	T	C	.	.	.	G	C	T	C	T	C	G	C	A	T	C	G	A	T	.	.	.	G	A	A	.	.	T	A	G	.	A	A	A	C	.	.	C
Ziziphus attopensis LC509596	T	C	G	C	A	T	.	.	.	G	T	A	C	.	G	T	.	.	.	T	C	A	.	.	A	C	G	.	C	T	C	T	C	G	G	C	A	A	C	G	G	A	.	A	T	C	.	C	G
Ziziphus attopensis LC509597	T	C	G	C	A	T	.	.	.	G	T	A	C	.	G	T	.	.	.	T	C	A	.	.	A	C	G	.	C	T	C	T	C	G	G	C	A	A	C	G	G	A	.	A	T	C	.	C	G
Ziziphus attopensis LC509598	T	C	G	C	A	T	.	.	.	G	T	A	C	.	G	T	.	.	.	T	C	A	.	.	A	C	G	.	C	T	C	T	C	G	G	C	A	A	C	G	G	A	.	A	T	C	.	C	G
Ziziphus attopensis LC509599	T	C	G	C	A	T	.	.	.	G	T	A	C	.	G	T	.	.	.	T	C	A	.	.	A	C	G	.	C	T	C	T	C	G	G	C	A	A	C	G	G	A	.	A	T	C	.	C	G
Betula alnoides LC509575	T	T	G	A	A	C	G	C	A	A	G	T	T	G	C	G	C	C	C	G	A	A	G	C	C	A	C	C	T	G	G	C	C	G	A	G	G	G	C	A	C	G	T	C	T	G	C	C	T
Betula alnoides LC509576	.	.	.	.	.	.	.	.	.	.	.	.	.	.	.	.	.	.	.	.	.	.	.	.	.	.	.	.	.	.	.	.	.	.	.	.	.	.	.	.	.	.	.	.	.	.	.	.	.
Betula alnoides LC509577	.	.	.	.	.	.	.	.	.	.	.	.	.	.	.	.	.	.	.	.	.	.	.	.	.	.	.	.	.	.	.	.	.	.	.	.	.	.	.	.	.	.	.	.	.	.	.	.	.
Betula alnoides LC509578	.	.	.	.	.	.	.	.	.	.	.	.	.	.	.	.	.	.	.	.	.	.	.	.	.	.	.	.	.	.	.	.	.	.	.	.	.	.	.	.	.	.	.	.	.	.	.	.	.
Betula alnoides LC509579	.	.	.	.	.	.	.	.	.	.	.	.	.	.	.	.	.	.	.	.	.	.	.	.	.	.	.	.	.	.	.	.	.	.	.	.	.	.	.	.	.	.	.	.	.	.	.	.	.
Betula alnoides LC509580	.	.	.	.	.	.	.	.	.	.	.	.	.	.	.	.	.	.	.	.	.	.	.	.	.	.	.	.	.	.	.	.	.	.	.	.	.	.	.	.	.	.	.	.	.	.	.	.	.
Betula alnoides LC509581	.	.	.	.	.	.	.	.	.	.	.	.	.	.	.	.	.	.	.	.	.	.	.	.	.	.	.	.	.	.	.	.	.	.	.	.	.	.	.	.	.	.	.	.	.	.	.	.	.
Betula alnoides LC509582	.	.	.	.	.	.	.	.	.	.	.	.	.	.	.	.	.	.	.	.	.	.	.	.	.	.	.	.	.	.	.	.	.	.	.	.	.	.	.	.	.	.	.	.	.	.	.	.	.
Betula alnoides LC509583	.	.	.	.	.	.	.	.	.	.	.	.	.	.	.	.	.	.	.	.	.	.	.	.	.	.	.	.	.	.	.	.	.	.	.	.	.	.	.	.	.	.	.	.	.	.	.	.	.
Betula alnoides LC509584	.	.	.	.	.	.	.	.	.	.	.	.	.	.	.	.	.	.	.	.	.	.	.	.	.	.	.	.	.	.	.	.	.	.	.	.	.	.	.	.	.	.	.	.	.	.	.	.	.
Betula alnoides LC509585	.	.	.	.	.	.	.	.	.	.	.	.	.	.	.	.	.	.	.	.	.	.	.	.	.	.	.	.	.	.	.	.	.	.	.	.	.	.	.	.	.	.	.	.	.	.	.	.	.
Betula alnoides LC509586	.	.	.	.	.	.	.	.	.	.	.	.	.	.	.	.	.	.	.	.	.	.	.	.	.	.	.	.	.	.	.	.	.	.	.	.	.	.	.	.	.	.	.	.	.	.	.	.	.
Betula alnoides LC509587	.	.	.	.	.	.	.	.	.	.	.	.	.	.	.	.	.	.	.	.	.	.	.	.	.	.	.	.	.	.	.	.	.	.	.	.	.	.	.	.	.	.	.	.	.	.	.	.	.
Strychnos axillaris LC509588	A	C	C	.	T	.	.	A	G	T	C	.	.	T	G	A	A	.	G	C	.	.	.	T	T	G	.	G	C	C	C	G	A	A	G	C	C	A	.	T	A	.	G	.	C	.	A	G	G
Strychnos axillaris LC509589	A	C	C	.	T	.	.	A	G	T	C	.	.	T	G	A	A	.	G	C	.	.	.	T	T	G	.	G	C	C	C	G	A	A	G	C	C	A	.	T	A	.	G	.	C	.	A	G	G
Strychnos axillaris LC509590	A	C	C	.	T	.	.	A	G	T	C	.	.	T	G	A	A	.	G	C	.	.	.	T	T	G	.	G	C	C	C	G	A	A	G	C	C	A	.	T	A	.	G	.	C	.	A	G	G
Strychnos axillaris LC509591	A	C	C	.	T	.	.	A	G	T	C	.	.	T	G	A	A	.	G	C	.	.	.	T	T	G	.	G	C	C	C	G	A	A	G	C	C	A	.	T	A	.	G	.	C	.	A	G	G
Strychnos axillaris LC509592	A	C	C	.	T	.	.	A	G	T	C	.	.	T	G	A	A	.	G	C	.	.	.	T	T	G	.	G	C	C	C	G	A	A	G	C	C	A	.	T	A	.	G	.	C	.	A	G	G
Strychnos axillaris LC509593	A	C	C	.	T	.	.	A	G	T	C	.	.	T	G	A	A	.	G	C	.	.	.	T	T	G	.	G	C	C	C	G	A	A	G	C	C	A	.	T	A	.	G	.	C	.	A	G	G
Strychnos axillaris LC509594	A	C	C	.	T	.	.	A	G	T	C	.	.	T	G	A	A	.	G	C	.	.	.	T	T	G	.	G	C	C	C	G	A	A	G	C	C	A	.	T	A	.	G	.	C	.	A	G	G
Strychnos axillaris LC509595	A	C	C	.	T	.	.	A	G	T	C	.	.	T	G	A	A	.	G	C	.	.	.	T	T	G	.	G	C	C	C	G	A	A	G	C	C	A	.	T	A	.	G	.	C	.	A	G	G
Ziziphus attopensis LC509596	G	C	.	.	T	A	C	T	T	G	.	.	G	T	G	A	A	T	T	.	C	.	.	A	A	T	.	.	C	.	T	G	A	A	C	C	A	T	.	G	A	.	.	T	.	T	T	G	A
Ziziphus attopensis LC509597	G	C	.	.	T	A	C	T	T	G	.	.	G	T	G	A	A	T	T	.	C	.	.	A	A	T	.	.	C	.	T	G	A	A	C	C	A	T	.	G	A	.	.	T	.	T	T	G	A
Ziziphus attopensis LC509598	G	C	.	.	T	A	C	T	T	G	.	.	G	T	G	A	A	T	T	.	C	.	.	A	A	T	.	.	C	.	T	G	A	A	C	C	A	T	.	G	A	.	.	T	.	T	T	G	A
Ziziphus attopensis LC509599	G	C	.	.	T	A	C	T	T	G	.	.	G	T	G	A	A	T	T	.	C	.	.	A	A	T	.	.	C	.	T	G	A	A	C	C	A	T	.	G	A	.	.	T	.	T	T	G	A
Betula alnoides LC509575	C	T	C	C	T	T	G	C	A	A	A	G	G	G	A	C	G	A	G	G	G	G	G	C	C	A	G	T	G	G	G	G	C	A	G	A	A	A	T	T	G	G	C	C	T	C	C	C	G
Betula alnoides LC509576	.	.	.	.	.	.	.	.	.	.	.	.	.	.	.	.	.	.	.	.	.	.	.	.	.	.	.	.	.	.	.	.	.	.	.	.	.	.	.	.	.	.	.	.	.	.	.	.	.
Betula alnoides LC509577	.	.	.	.	.	.	.	.	.	.	.	.	.	.	.	.	.	.	.	.	.	.	.	.	.	.	.	.	.	.	.	.	.	.	.	.	.	.	.	.	.	.	.	.	.	.	.	.	.
Betula alnoides LC509578	.	.	.	.	.	.	.	.	.	.	.	.	.	.	.	.	.	.	.	.	.	.	.	.	.	.	.	.	.	.	.	.	.	.	.	.	.	.	.	.	.	.	.	.	.	.	.	.	.
Betula alnoides LC509579	.	.	.	.	.	.	.	.	.	.	.	.	.	.	.	.	.	.	.	.	.	.	.	.	.	.	.	.	.	.	.	.	.	.	.	.	.	.	.	.	.	.	.	.	.	.	.	.	.
Betula alnoides LC509580	.	.	.	.	.	.	.	.	.	.	.	.	.	.	.	.	.	.	.	.	.	.	.	.	.	.	.	.	.	.	.	.	.	.	.	.	.	.	.	.	.	.	.	.	.	.	.	.	.
Betula alnoides LC509581	.	.	.	.	.	.	.	.	.	.	.	.	.	.	.	.	.	.	.	.	.	.	.	.	.	.	.	.	.	.	.	.	.	.	.	.	.	.	.	.	.	.	.	.	.	.	.	.	.
Betula alnoides LC509582	.	.	.	.	.	.	.	.	.	.	.	.	.	.	.	.	.	.	.	.	.	.	.	.	.	.	.	.	.	.	.	.	.	.	.	.	.	.	.	.	.	.	.	.	.	.	.	.	.
Betula alnoides LC509583	.	.	.	.	.	.	.	.	.	.	.	.	.	.	.	.	.	.	.	.	.	.	.	.	.	.	.	.	.	.	.	.	.	.	.	.	.	.	.	.	.	.	.	.	.	.	.	.	.
Betula alnoides LC509584	.	.	.	.	.	.	.	.	.	.	.	.	.	.	.	.	.	.	.	.	.	.	.	.	.	.	.	.	.	.	.	.	.	.	.	.	.	.	.	.	.	.	.	.	.	.	.	.	.
Betula alnoides LC509585	.	.	.	.	.	.	.	.	.	.	.	.	.	.	.	.	.	.	.	.	.	.	.	.	.	.	.	.	.	.	.	.	.	.	.	.	.	.	.	.	.	.	.	.	.	.	.	.	.
Betula alnoides LC509586	.	.	.	.	.	.	.	.	.	.	.	.	.	.	.	.	.	.	.	.	.	.	.	.	.	.	.	.	.	.	.	.	.	.	.	.	.	.	.	.	.	.	.	.	.	.	.	.	.
Betula alnoides LC509587	.	.	.	.	.	.	.	.	.	.	.	.	.	.	.	.	.	.	.	.	.	.	.	.	.	.	.	.	.	.	.	.	.	.	.	.	.	.	.	.	.	.	.	.	.	.	.	.	.
Strychnos axillaris LC509588	G	-	.	.	C	C	C	.	C	.	T	.	C	.	C	.	C	.	C	T	C	A	.	G	.	C	.	.	.	C	.	A	G	G	.	G	G	.	C	G	.	A	T	A	A	T	G	G	C
Strychnos axillaris LC509589	G	-	.	.	C	C	C	.	C	.	T	.	C	.	C	.	C	.	C	T	C	A	.	G	.	C	.	.	.	C	.	A	G	G	.	G	G	.	C	G	.	A	T	A	A	T	G	G	C
Strychnos axillaris LC509590	G	-	.	.	C	C	C	.	C	.	T	.	C	.	C	.	C	.	C	T	C	A	.	G	.	C	.	.	.	C	.	A	G	G	.	G	G	.	C	G	.	A	T	A	A	T	G	G	C
Strychnos axillaris LC509591	G	-	.	.	C	C	C	.	C	.	T	.	C	.	C	.	C	.	C	T	C	A	.	G	.	C	.	.	.	C	.	A	G	G	.	G	G	.	C	G	.	A	T	A	A	T	G	G	C
Strychnos axillaris LC509592	G	-	.	.	C	C	C	.	C	.	T	.	C	.	C	.	C	.	C	T	C	A	.	G	.	C	.	.	.	C	.	A	G	G	.	G	G	.	C	G	.	A	T	A	A	T	G	G	C
Strychnos axillaris LC509593	G	-	.	.	C	C	C	.	C	.	T	.	C	.	C	.	C	.	C	T	C	A	.	G	.	C	.	.	.	C	.	A	G	G	.	G	G	.	C	G	.	A	T	A	A	T	G	G	C
Strychnos axillaris LC509594	G	C	.	.	C	C	C	.	C	.	T	.	C	.	C	.	C	.	C	T	C	A	.	G	.	C	.	.	.	C	.	A	G	G	.	G	G	.	C	G	.	A	T	A	A	T	G	G	C
Strychnos axillaris LC509595	G	C	.	.	C	C	C	.	C	.	T	.	C	.	C	.	C	.	C	T	C	A	.	G	.	C	.	.	.	C	.	A	G	G	.	G	G	.	C	G	.	A	T	A	A	T	G	G	C
Ziziphus attopensis LC509596	G	G	G	.	A	C	.	T	C	T	G	C	C	T	G	G	.	C	.	T	C	A	C	A	.	.	C	A	A	C	.	T	T	G	C	C	C	C	C	C	A	C	.	.	C	.	A	A	C
Ziziphus attopensis LC509597	G	G	G	.	A	C	.	T	C	T	G	C	C	T	G	G	.	C	.	T	C	A	C	A	.	.	C	A	A	C	.	T	T	G	C	C	C	C	C	C	A	C	.	.	C	.	A	A	C
Ziziphus attopensis LC509598	G	G	G	.	A	C	.	T	C	T	G	C	C	T	G	G	.	C	.	T	C	A	C	A	.	.	C	A	A	C	.	T	T	G	C	C	C	C	C	C	A	C	.	.	C	.	A	A	C
Ziziphus attopensis LC509599	G	G	G	.	A	C	.	T	C	T	G	C	C	T	G	G	.	C	.	T	C	A	C	A	.	.	C	A	A	C	.	T	T	G	C	C	C	C	C	C	A	C	.	.	C	.	A	A	C
Betula alnoides LC509575	A	G	T	C	C	T	C	G	G	C	G	A	C	G	C	G	C	G	C	C	A	C	G	A	C	A	A	T	C	G	G	T	G	G	T	T	G	A	C	A	A	A	C	C	C	T	C	G	T
Betula alnoides LC509576	.	.	.	.	.	.	.	.	.	.	.	.	.	.	.	.	.	.	.	.	.	.	.	.	.	.	.	.	.	.	.	.	.	.	.	.	.	.	.	.	.	.	.	.	.	.	.	.	.
Betula alnoides LC509577	.	.	.	.	.	.	.	.	.	.	.	.	.	.	.	.	.	.	.	.	.	.	.	.	.	.	.	.	.	.	.	.	.	.	.	.	.	.	.	.	.	.	.	.	.	.	.	.	.
Betula alnoides LC509578	.	.	.	.	.	.	.	.	.	.	.	.	.	.	.	.	.	.	.	.	.	.	.	.	.	.	.	.	.	.	.	.	.	.	.	.	.	.	.	.	.	.	.	.	.	.	.	.	.
Betula alnoides LC509579	.	.	.	.	.	.	.	.	.	.	.	.	.	.	.	.	.	.	.	.	.	.	.	.	.	.	.	.	.	.	.	.	.	.	.	.	.	.	.	.	.	.	.	.	.	.	.	.	.
Betula alnoides LC509580	.	.	.	.	.	.	.	.	.	.	.	.	.	.	.	.	.	.	.	.	.	.	.	.	.	.	.	.	.	.	.	.	.	.	.	.	.	.	.	.	.	.	.	.	.	.	.	.	.
Betula alnoides LC509581	.	.	.	.	.	.	.	.	.	.	.	.	.	.	.	.	.	.	.	.	.	.	.	.	.	.	.	.	.	.	.	.	.	.	.	.	.	.	.	.	.	.	.	.	.	.	.	.	.
Betula alnoides LC509582	.	.	.	.	.	.	.	.	.	.	.	.	.	.	.	.	.	.	.	.	.	.	.	.	.	.	.	.	.	.	.	.	.	.	.	.	.	.	.	.	.	.	.	.	.	.	.	.	.
Betula alnoides LC509583	.	.	.	.	.	.	.	.	.	.	.	.	.	.	.	.	.	.	.	.	.	.	.	.	.	.	.	.	.	.	.	.	.	.	.	.	.	.	.	.	.	.	.	.	.	.	.	.	.
Betula alnoides LC509584	.	.	.	.	.	.	.	.	.	.	.	.	.	.	.	.	.	.	.	.	.	.	.	.	.	.	.	.	.	.	.	.	.	.	.	.	.	.	.	.	.	.	.	.	.	.	.	.	.
Betula alnoides LC509585	.	.	.	.	.	.	.	.	.	.	.	.	.	.	.	.	.	.	.	.	.	.	.	.	.	.	.	.	.	.	.	.	.	.	.	.	.	.	.	.	.	.	.	.	.	.	.	.	.
Betula alnoides LC509586	.	.	.	.	.	.	.	.	.	.	.	.	.	.	.	.	.	.	.	.	.	.	.	.	.	.	.	.	.	.	.	.	.	.	.	.	.	.	.	.	.	.	.	.	.	.	.	.	.
Betula alnoides LC509587	.	.	.	.	.	.	.	.	.	.	.	.	.	.	.	.	.	.	.	.	.	.	.	.	.	.	.	.	.	.	.	.	.	.	.	.	.	.	.	.	.	.	.	.	.	.	.	.	.
Strychnos axillaris LC509588	.	.	A	G	T	C	T	C	T	.	C	C	G	A	T	.	G	.	.	G	T	.	A	C	G	.	C	A	A	.	T	G	.	T	G	G	T	T	G	.	.	T	G	.	.	.	.	A	A
Strychnos axillaris LC509589	.	.	A	G	T	C	T	C	T	.	C	C	G	A	T	.	G	.	.	G	T	.	A	C	G	.	C	A	A	.	T	G	.	T	G	G	T	T	G	.	.	T	G	.	.	.	.	A	A
Strychnos axillaris LC509590	.	.	A	G	T	C	T	C	T	.	C	C	G	A	T	.	G	.	.	G	T	.	A	C	G	.	C	A	A	.	T	G	.	T	G	G	T	T	G	.	.	T	G	.	.	.	.	A	A
Strychnos axillaris LC509591	.	.	A	G	T	C	T	C	T	.	C	C	G	A	T	.	G	.	.	G	T	.	A	C	G	.	C	A	A	.	T	G	.	T	G	G	T	T	G	.	.	T	G	.	.	.	.	A	A
Strychnos axillaris LC509592	.	.	A	G	T	C	T	C	T	.	C	C	G	A	T	.	G	.	.	G	T	.	A	C	G	.	C	A	A	.	T	G	.	T	G	G	T	T	G	.	.	T	G	.	.	.	.	A	A
Strychnos axillaris LC509593	.	.	A	G	T	C	T	C	T	.	C	C	G	A	T	.	G	.	.	G	T	.	A	C	G	.	C	A	A	.	T	G	.	T	G	G	T	T	G	.	.	T	G	.	.	.	.	A	A
Strychnos axillaris LC509594	.	.	A	G	T	C	T	C	T	.	C	C	G	A	T	.	G	.	.	G	T	.	A	C	G	.	C	A	A	.	T	G	.	T	G	G	T	T	G	.	.	T	G	.	.	.	.	A	A
Strychnos axillaris LC509595	.	.	A	G	T	C	T	C	T	.	C	C	G	A	T	.	G	.	.	G	T	.	A	C	G	.	C	A	A	.	T	G	.	T	G	G	T	T	G	.	.	T	G	.	.	.	.	A	A
Ziziphus attopensis LC509596	C	T	G	G	.	C	T	C	C	.	.	T	G	C	G	C	.	A	.	G	G	T	C	C	G	C	G	G	.	C	.	G	C	C	A	A	A	.	.	G	T	.	-	G	T	C	.	C	C
Ziziphus attopensis LC509597	C	T	G	G	.	C	T	C	C	.	.	T	G	C	G	C	.	A	.	G	G	T	C	C	G	C	G	G	.	Y	.	G	C	C	A	A	A	.	.	G	T	.	G	G	T	C	.	C	C
Ziziphus attopensis LC509598	C	T	G	G	.	C	T	C	C	.	.	T	G	C	G	C	.	A	.	G	G	T	C	C	G	C	G	G	.	Y	.	G	C	C	A	A	A	.	.	G	T	.	G	G	T	C	.	C	C
Ziziphus attopensis LC509599	C	T	G	G	.	C	T	C	C	.	.	T	G	C	G	C	.	A	.	G	G	T	C	C	G	C	G	G	.	Y	.	G	C	C	A	A	A	.	.	G	T	.	G	G	T	C	.	C	C
Betula alnoides LC509575	G	T	G	C	T	C	T	T	T	G	A	C	C	C	T	G	C	T	G	T	G	T	C	G	C	G	C	T	A	G	C	G	A	T	G	C	T	T	C	C	A	-	-	-	-	-	-	-	-
Betula alnoides LC509576	.	.	.	.	.	.	.	.	.	.	.	.	.	.	.	.	.	.	.	.	.	.	.	.	.	.	.	.	.	.	.	.	.	.	.	.	.	.	.	.	.	-	-	-	-	-	-	-	-
Betula alnoides LC509577	.	.	.	.	.	.	.	.	.	.	.	.	.	.	.	.	.	.	.	.	.	.	.	.	.	.	.	.	.	.	.	.	.	.	.	.	.	.	.	.	.	-	-	-	-	-	-	-	-
Betula alnoides LC509578	.	.	.	.	.	.	.	.	.	.	.	.	.	.	.	.	.	.	.	.	.	.	.	.	.	.	.	.	.	.	.	.	.	.	.	.	.	.	.	.	.	-	-	-	-	-	-	-	-
Betula alnoides LC509579	.	.	.	.	.	.	.	.	.	.	.	.	.	.	.	.	.	.	.	.	.	.	.	.	.	.	.	.	.	.	.	.	.	.	.	.	.	.	.	.	.	-	-	-	-	-	-	-	-
Betula alnoides LC509580	.	.	.	.	.	.	.	.	.	.	.	.	.	.	.	.	.	.	.	.	.	.	.	.	.	.	.	.	.	.	.	.	.	.	.	.	.	.	.	.	.	-	-	-	-	-	-	-	-
Betula alnoides LC509581	.	.	.	.	.	.	.	.	.	.	.	.	.	.	.	.	.	.	.	.	.	.	.	.	.	.	.	.	.	.	.	.	.	.	.	.	.	.	.	.	.	-	-	-	-	-	-	-	-
Betula alnoides LC509582	.	.	.	.	.	.	.	.	.	.	.	.	.	.	.	.	.	.	.	.	.	.	.	.	.	.	.	.	.	.	.	.	.	.	.	.	.	.	.	.	.	-	-	-	-	-	-	-	-
Betula alnoides LC509583	.	.	.	.	.	.	.	.	.	.	.	.	.	.	.	.	.	.	.	.	.	.	.	.	.	.	.	.	.	.	.	.	.	.	.	.	.	.	.	.	.	-	-	-	-	-	-	-	-
Betula alnoides LC509584	.	.	.	.	.	.	.	.	.	.	.	.	.	.	.	.	.	.	.	.	.	.	.	.	.	.	.	.	.	.	.	.	.	.	.	.	.	.	.	.	.	-	-	-	-	-	-	-	-
Betula alnoides LC509585	.	.	.	.	.	.	.	.	.	.	.	.	.	.	.	.	.	.	.	.	.	.	.	.	.	.	.	.	.	.	.	.	.	.	.	.	.	.	.	.	.	-	-	-	-	-	-	-	-
Betula alnoides LC509586	.	.	.	.	.	.	.	.	.	.	.	.	.	.	.	.	.	.	.	.	.	.	.	.	.	.	.	.	.	.	.	.	.	.	.	.	.	.	.	.	.	-	-	-	-	-	-	-	-
Betula alnoides LC509587	.	.	.	.	.	.	.	.	.	.	.	.	.	.	.	.	.	.	.	.	.	.	.	.	.	.	.	.	.	.	.	.	.	.	.	.	.	.	.	.	.	-	-	-	-	-	-	-	-
Strychnos axillaris LC509588	T	G	.	A	G	A	G	G	A	T	T	G	.	.	C	C	G	A	C	C	C	.	A	A	.	C	G	C	G	A	G	T	G	.	C	T	C	G	A	.	G	A	C	T	C	T	C	G	G
Strychnos axillaris LC509589	T	G	.	A	G	A	G	G	A	T	T	G	.	.	C	C	G	A	C	C	C	.	A	A	.	C	G	C	G	A	G	T	G	.	C	T	C	G	A	.	G	A	C	T	C	T	C	G	G
Strychnos axillaris LC509590	T	G	.	A	G	A	G	G	A	T	T	G	.	.	C	C	G	A	C	C	C	.	A	A	.	C	G	C	G	A	G	T	G	.	C	T	C	G	A	.	G	A	C	T	C	T	C	G	G
Strychnos axillaris LC509591	T	G	.	A	G	A	G	G	A	T	T	G	.	.	C	C	G	A	C	C	C	.	A	A	.	C	G	C	G	A	G	T	G	.	C	T	C	G	A	.	G	A	C	T	C	T	C	G	G
Strychnos axillaris LC509592	T	G	.	A	G	A	G	G	A	T	T	G	.	.	C	C	G	A	C	C	C	.	A	A	.	C	G	C	G	A	G	T	G	.	C	T	C	G	A	.	G	A	C	T	C	T	C	G	G
Strychnos axillaris LC509593	T	G	.	A	G	A	G	G	A	T	T	G	.	.	C	C	G	A	C	C	C	.	A	A	.	C	G	C	G	A	G	T	G	.	C	T	C	G	A	.	G	A	C	T	C	T	C	G	G
Strychnos axillaris LC509594	T	G	.	A	G	A	G	G	A	T	T	G	.	.	C	C	G	A	C	C	C	.	A	A	.	C	G	C	G	A	G	T	G	.	C	T	C	G	A	.	G	A	C	T	C	T	C	G	G
Strychnos axillaris LC509595	T	G	.	A	G	A	G	G	A	T	T	G	.	.	C	C	G	A	C	C	C	.	A	A	.	C	G	C	G	A	G	T	G	.	C	T	C	G	A	.	G	A	C	T	C	T	C	G	G
Ziziphus attopensis LC509596	T	C	C	A	A	A	C	C	.	C	G	T	A	T	C	C	.	C	.	C	T	G	.	.	T	.	.	G	C	.	G	A	T	C	.	.	C	G	.	.	G	C	G	G	C	C	Y	C	A
Ziziphus attopensis LC509597	T	C	C	A	A	A	C	C	.	C	G	T	A	T	C	C	.	C	.	C	T	G	.	.	T	.	.	G	C	.	G	A	T	C	.	.	C	G	.	.	G	C	G	G	C	C	Y	C	A
Ziziphus attopensis LC509598	T	C	C	A	A	A	C	C	.	C	G	T	A	T	C	C	.	C	.	C	T	G	.	.	T	.	.	G	C	.	G	A	T	C	.	.	C	G	.	.	G	C	G	G	C	C	Y	C	A
Ziziphus attopensis LC509599	T	C	C	A	A	A	C	C	.	C	G	T	A	T	C	C	.	C	.	C	T	G	.	.	T	.	.	G	C	.	G	A	T	C	.	.	C	G	.	.	G	C	G	G	C	C	Y	C	A
Betula alnoides LC509575	-	-	-	-	-
Betula alnoides LC509576	-	-	-	-	-
Betula alnoides LC509577	-	-	-	-	-
Betula alnoides LC509578	-	-	-	-	-
Betula alnoides LC509579	-	-	-	-	-
Betula alnoides LC509580	-	-	-	-	-
Betula alnoides LC509581	-	-	-	-	-
Betula alnoides LC509582	-	-	-	-	-
Betula alnoides LC509583	-	-	-	-	-
Betula alnoides LC509584	-	-	-	-	-
Betula alnoides LC509585	-	-	-	-	-
Betula alnoides LC509586	-	-	-	-	-
Betula alnoides LC509587	-	-	-	-	-
Strychnos axillaris LC509588	-	-	-	-	-
Strychnos axillaris LC509589	-	-	-	-	-
Strychnos axillaris LC509590	-	-	-	-	-
Strychnos axillaris LC509591	-	-	-	-	-
Strychnos axillaris LC509592	-	-	-	-	-
Strychnos axillaris LC509593	-	-	-	-	-
Strychnos axillaris LC509594	-	-	-	-	-
Strychnos axillaris LC509595	-	-	-	-	-
Ziziphus attopensis LC509596	C	T	A	C	A
Ziziphus attopensis LC509597	C	T	A	C	A
Ziziphus attopensis LC509598	C	T	A	C	A
Ziziphus attopensis LC509599	C	T	A	C	A
[truncated: 31 more columns]

## Sheet: ITS1
S3 Spreadsheet. ITS1 sequence alignment of the authentic samples.
Domain: Data
Betula alnoides LC509575	T	C	G	A	A	A	C	C	T	G	C	C	C	A	G	C	A	G	A	A	C	G	A	C	C	C	G	T	G	A	A	C	C	T	G	T	T	G	A	A	A	C	A	A	C	T	G	G	G
Betula alnoides LC509576	.	.	.	.	.	.	.	.	.	.	.	.	.	.	.	.	.	.	.	.	.	.	.	.	.	.	.	.	.	.	.	.	.	.	.	.	.	.	.	.	.	.	.	.	.	.	.	.	.
Betula alnoides LC509577	.	.	.	.	.	.	.	.	.	.	.	.	.	.	.	.	.	.	.	.	.	.	.	.	.	.	.	.	.	.	.	.	.	.	.	.	.	.	.	.	.	.	.	.	.	.	.	.	.
Betula alnoides LC509578	.	.	.	.	.	.	.	.	.	.	.	.	.	.	.	.	.	.	.	.	.	.	.	.	.	.	.	.	.	.	.	.	.	.	.	.	.	.	.	.	.	.	.	.	.	.	.	.	.
Betula alnoides LC509579	.	.	.	.	.	.	.	.	.	.	.	.	.	.	.	.	.	.	.	.	.	.	.	.	.	.	.	.	.	.	.	.	.	.	.	.	.	.	.	.	.	.	.	.	.	.	.	.	.
Betula alnoides LC509580	.	.	.	.	.	.	.	.	.	.	.	.	.	.	.	.	.	.	.	.	.	.	.	.	.	.	.	.	.	.	.	.	.	.	.	.	.	.	.	.	.	.	.	.	.	.	.	.	.
Betula alnoides LC509581	.	.	.	.	.	.	.	.	.	.	.	.	.	.	.	.	.	.	.	.	.	.	.	.	.	.	.	.	.	.	.	.	.	.	.	.	.	.	.	.	.	.	.	.	.	.	.	.	.
Betula alnoides LC509582	.	.	.	.	.	.	.	.	.	.	.	.	.	.	.	.	.	.	.	.	.	.	.	.	.	.	.	.	.	.	.	.	.	.	.	.	.	.	.	.	.	.	.	.	.	.	.	.	.
Betula alnoides LC509583	.	.	.	.	.	.	.	.	.	.	.	.	.	.	.	.	.	.	.	.	.	.	.	.	.	.	.	.	.	.	.	.	.	.	.	.	.	.	.	.	.	.	.	.	.	.	.	.	.
Betula alnoides LC509584	.	.	.	.	.	.	.	.	.	.	.	.	.	.	.	.	.	.	.	.	.	.	.	.	.	.	.	.	.	.	.	.	.	.	.	.	.	.	.	.	.	.	.	.	.	.	.	.	.
Betula alnoides LC509585	.	.	.	.	.	.	.	.	.	.	.	.	.	.	.	.	.	.	.	.	.	.	.	.	.	.	.	.	.	.	.	.	.	.	.	.	.	.	.	.	.	.	.	.	.	.	.	.	.
Betula alnoides LC509586	.	.	.	.	.	.	.	.	.	.	.	.	.	.	.	.	.	.	.	.	.	.	.	.	.	.	.	.	.	.	.	.	.	.	.	.	.	.	.	.	.	.	.	.	.	.	.	.	.
Betula alnoides LC509587	.	.	.	.	.	.	.	.	.	.	.	.	.	.	.	.	.	.	.	.	.	.	.	.	.	.	.	.	.	.	.	.	.	.	.	.	.	.	.	.	.	.	.	.	.	.	.	.	.
Strychnos axillaris LC509588	A	.	.	.	.	T	.	.	.	.	.	A	G	.	C	G	.	C	C	C	G	C	G	A	A	.	A	C	.	T	T	T	.	.	A	C	G	C	C	C	.	.	G	G	G	C	.	T	C
Strychnos axillaris LC509589	A	.	.	.	.	T	.	.	.	.	.	A	G	.	C	G	.	C	C	C	G	C	G	A	A	.	A	C	.	T	T	T	.	.	A	C	G	C	C	C	.	.	G	G	G	C	.	T	C
Strychnos axillaris LC509590	A	.	.	.	.	T	.	.	.	.	.	A	G	.	C	G	.	C	C	C	G	C	G	A	A	.	A	C	.	T	T	T	.	.	A	C	G	C	C	C	.	.	G	G	G	C	.	T	C
Strychnos axillaris LC509591	A	.	.	.	.	T	.	.	.	.	.	A	G	.	C	G	.	C	C	C	G	C	G	A	A	.	A	C	.	T	T	T	.	.	A	C	G	C	C	C	.	.	G	G	G	C	.	T	C
Strychnos axillaris LC509592	A	.	.	.	.	T	.	.	.	.	.	A	G	.	C	G	.	C	C	C	G	C	G	A	A	.	A	C	.	T	T	T	.	.	A	C	G	C	C	C	.	.	G	G	G	C	.	T	C
Strychnos axillaris LC509593	A	.	.	.	.	T	.	.	.	.	.	A	G	.	C	G	.	C	C	C	G	C	G	A	A	.	A	C	.	T	T	T	.	.	A	C	G	C	C	C	.	.	G	G	G	C	.	T	C
Strychnos axillaris LC509594	A	.	.	.	.	T	.	.	.	.	.	A	G	.	C	G	.	C	C	C	G	C	G	A	A	.	A	C	.	T	T	T	.	.	A	C	G	C	C	C	.	.	G	G	G	C	.	T	C
Strychnos axillaris LC509595	A	.	.	.	.	T	.	.	.	.	.	A	G	.	C	G	.	C	C	C	G	C	G	A	A	.	A	C	.	T	T	T	.	.	A	C	G	C	C	C	.	.	G	G	G	C	.	T	C
Ziziphus attopensis LC509596	.	.	.	.	.	.	.	.	.	.	.	.	.	.	.	.	.	.	.	.	.	.	.	.	.	G	.	C	.	.	.	.	.	C	.	.	A	A	.	.	.	A	C	.	.	A	C	C	.
Ziziphus attopensis LC509597	.	.	.	.	.	.	.	.	.	.	.	.	.	.	.	.	.	.	.	.	.	.	.	.	.	G	.	C	.	.	.	.	.	C	.	.	A	A	.	.	.	A	C	.	.	A	C	C	.
Ziziphus attopensis LC509598	.	.	.	.	.	.	.	.	.	.	.	.	.	.	.	.	.	.	.	.	.	.	.	.	.	G	.	C	.	.	.	.	.	C	.	.	A	A	.	.	.	A	C	.	.	A	C	C	.
Ziziphus attopensis LC509599	.	.	.	.	.	.	.	.	.	.	.	.	.	.	.	.	.	.	.	.	.	.	.	.	.	G	.	C	.	.	.	.	.	C	.	.	A	A	.	.	.	A	C	.	.	A	C	C	.
Betula alnoides LC509575	A	C	G	G	T	A	G	G	G	A	G	A	C	A	C	T	C	G	T	G	C	A	T	C	C	C	T	G	C	C	G	A	A	C	A	A	C	G	A	A	C	C	C	C	G	G	C	G	C
Betula alnoides LC509576	.	.	.	.	.	.	.	.	.	.	.	.	.	.	.	.	.	.	.	.	.	.	.	.	.	.	.	.	.	.	.	.	.	.	.	.	.	.	.	.	.	.	.	.	.	.	.	.	.
Betula alnoides LC509577	.	.	.	.	.	.	.	.	.	.	.	.	.	.	.	.	.	.	.	.	.	.	.	.	.	.	.	.	.	.	.	.	.	.	.	.	.	.	.	.	.	.	.	.	.	.	.	.	.
Betula alnoides LC509578	.	.	.	.	.	.	.	.	.	.	.	.	.	.	.	.	.	.	.	.	.	.	.	.	.	.	.	.	.	.	.	.	.	.	.	.	.	.	.	.	.	.	.	.	.	.	.	.	.
Betula alnoides LC509579	.	.	.	.	.	.	.	.	.	.	.	.	.	.	.	.	.	.	.	.	.	.	.	.	.	.	.	.	.	.	.	.	.	.	.	.	.	.	.	.	.	.	.	.	.	.	.	.	.
Betula alnoides LC509580	.	.	.	.	.	.	.	.	.	.	.	.	.	.	.	.	.	.	.	.	.	.	.	.	.	.	.	.	.	.	.	.	.	.	.	.	.	.	.	.	.	.	.	.	.	.	.	.	.
Betula alnoides LC509581	.	.	.	.	.	.	.	.	.	.	.	.	.	.	.	.	.	.	.	.	.	.	.	.	.	.	.	.	.	.	.	.	.	.	.	.	.	.	.	.	.	.	.	.	.	.	.	.	.
Betula alnoides LC509582	.	.	.	.	.	.	.	.	.	.	.	.	.	.	.	.	.	.	.	.	.	.	.	.	.	.	.	.	.	.	.	.	.	.	.	.	.	.	.	.	.	.	.	.	.	.	.	.	.
Betula alnoides LC509583	.	.	.	.	.	.	.	.	.	.	.	.	.	.	.	.	.	.	.	.	.	.	.	.	.	.	.	.	.	.	.	.	.	.	.	.	.	.	.	.	.	.	.	.	.	.	.	.	.
Betula alnoides LC509584	.	.	.	.	.	.	.	.	.	.	.	.	.	.	.	.	.	.	.	.	.	.	.	.	.	.	.	.	.	.	.	.	.	.	.	.	.	.	.	.	.	.	.	.	.	.	.	.	.
Betula alnoides LC509585	.	.	.	.	.	.	.	.	.	.	.	.	.	.	.	.	.	.	.	.	.	.	.	.	.	.	.	.	.	.	.	.	.	.	.	.	.	.	.	.	.	.	.	.	.	.	.	.	.
Betula alnoides LC509586	.	.	.	.	.	.	.	.	.	.	.	.	.	.	.	.	.	.	.	.	.	.	.	.	.	.	.	.	.	.	.	.	.	.	.	.	.	.	.	.	.	.	.	.	.	.	.	.	.
Betula alnoides LC509587	.	.	.	.	.	.	.	.	.	.	.	.	.	.	.	.	.	.	.	.	.	.	.	.	.	.	.	.	.	.	.	.	.	.	.	.	.	.	.	.	.	.	.	.	.	.	.	.	.
Strychnos axillaris LC509588	C	G	C	.	A	G	C	.	.	C	C	C	G	C	G	C	.	C	.	C	G	G	G	T	G	.	.	T	G	G	C	C	G	A	G	C	G	C	.	.	A	.	A	A	C	.	A	A	.
Strychnos axillaris LC509589	C	G	C	.	A	G	C	.	.	C	C	C	G	C	G	C	.	C	.	C	G	G	G	T	G	.	.	T	G	G	C	C	G	A	G	C	G	C	.	.	A	.	A	A	C	.	A	A	.
Strychnos axillaris LC509590	C	G	C	.	A	G	C	.	.	C	C	C	G	C	G	C	.	C	.	C	G	G	G	T	G	.	.	T	G	G	C	C	G	A	G	C	G	C	.	.	A	.	A	A	C	.	A	A	.
Strychnos axillaris LC509591	C	G	C	.	A	G	C	.	.	C	C	C	G	C	G	C	.	C	.	C	G	G	G	T	G	.	.	T	G	G	C	C	G	A	G	C	G	C	.	.	A	.	A	A	C	.	A	A	.
Strychnos axillaris LC509592	C	G	C	.	A	G	C	.	.	C	C	C	G	C	G	C	.	C	.	C	G	G	G	T	G	.	.	T	G	G	C	C	G	A	G	C	G	C	.	.	A	.	A	A	C	.	A	A	.
Strychnos axillaris LC509593	C	G	C	.	A	G	C	.	.	C	C	C	G	C	G	C	.	C	.	C	G	G	G	T	G	.	.	T	G	G	C	C	G	A	G	C	G	C	.	.	A	.	A	A	C	.	A	A	.
Strychnos axillaris LC509594	C	G	C	.	A	G	C	.	.	C	C	C	G	C	G	C	.	C	.	C	G	G	G	T	G	.	.	T	G	G	C	C	G	A	G	C	G	C	.	.	A	.	A	A	C	.	A	A	.
Strychnos axillaris LC509595	C	G	C	.	A	G	C	.	.	C	C	C	G	C	G	C	.	C	.	C	G	G	G	T	G	.	.	T	G	G	C	C	G	A	G	C	G	C	.	.	A	.	A	A	C	.	A	A	.
Ziziphus attopensis LC509596	C	T	C	T	.	C	.	.	T	C	.	G	G	G	G	G	.	C	G	C	A	T	C	.	.	G	.	.	.	.	T	C	G	.	C	C	G	T	C	G	A	T	G	.	.	C	G	.	T
Ziziphus attopensis LC509597	C	T	C	T	.	C	.	.	T	C	.	G	G	G	G	G	.	C	G	C	A	T	C	.	.	G	W	.	.	.	T	C	G	.	C	C	G	T	C	G	A	T	G	.	.	C	G	.	T
Ziziphus attopensis LC509598	C	T	C	T	.	C	.	.	T	C	.	G	G	G	G	G	.	C	G	C	A	T	C	.	.	G	.	.	.	.	T	C	G	.	C	C	G	T	C	G	A	T	G	.	.	C	G	.	T
Ziziphus attopensis LC509599	C	T	C	T	.	C	.	.	T	C	.	G	G	G	G	G	.	C	G	C	A	T	C	.	.	G	.	.	.	.	T	C	G	.	C	C	G	T	C	G	A	T	G	.	.	C	G	.	T
Betula alnoides LC509575	G	C	C	T	C	C	G	G	C	C	G	C	C	T	C	G	G	A	A	A	C	G	G	T	G	T	G	C	G	T	G	C	G	G	G	A	G	G	T	G	A	A	T	C	T	T	G	T	C
Betula alnoides LC509576	.	.	.	.	.	.	.	.	.	.	.	.	.	.	.	.	.	.	.	.	.	.	.	.	.	.	.	.	.	.	.	.	.	.	.	.	.	.	.	.	.	.	.	.	.	.	.	.	.
Betula alnoides LC509577	.	.	.	.	.	.	.	.	.	.	.	.	.	.	.	.	.	.	.	.	.	.	.	.	.	.	.	.	.	.	.	.	.	.	.	.	.	.	.	.	.	.	.	.	.	.	.	.	.
Betula alnoides LC509578	.	.	.	.	.	.	.	.	.	.	.	.	.	.	.	.	.	.	.	.	.	.	.	.	.	.	.	.	.	.	.	.	.	.	.	.	.	.	.	.	.	.	.	.	.	.	.	.	.
Betula alnoides LC509579	.	.	.	.	.	.	.	.	.	.	.	.	.	.	.	.	.	.	.	.	.	.	.	.	.	.	.	.	.	.	.	.	.	.	.	.	.	.	.	.	.	.	.	.	.	.	.	.	.
Betula alnoides LC509580	.	.	.	.	.	.	.	.	.	.	.	.	.	.	.	.	.	.	.	.	.	.	.	.	.	.	.	.	.	.	.	.	.	.	.	.	.	.	.	.	.	.	.	.	.	.	.	.	.
Betula alnoides LC509581	.	.	.	.	.	.	.	.	.	.	.	.	.	.	.	.	.	.	.	.	.	.	.	.	.	.	.	.	.	.	.	.	.	.	.	.	.	.	.	.	.	.	.	.	.	.	.	.	.
Betula alnoides LC509582	.	.	.	.	.	.	.	.	.	.	.	.	.	.	.	.	.	.	.	.	.	.	.	.	.	.	.	.	.	.	.	.	.	.	.	.	.	.	.	.	.	.	.	.	.	.	.	.	.
Betula alnoides LC509583	.	.	.	.	.	.	.	.	.	.	.	.	.	.	.	.	.	.	.	.	.	.	.	.	.	.	.	.	.	.	.	.	.	.	.	.	.	.	.	.	.	.	.	.	.	.	.	.	.
Betula alnoides LC509584	.	.	.	.	.	.	.	.	.	.	.	.	.	.	.	.	.	.	.	.	.	.	.	.	.	.	.	.	.	.	.	.	.	.	.	.	.	.	.	.	.	.	.	.	.	.	.	.	.
Betula alnoides LC509585	.	.	.	.	.	.	.	.	.	.	.	.	.	.	.	.	.	.	.	.	.	.	.	.	.	.	.	.	.	.	.	.	.	.	.	.	.	.	.	.	.	.	.	.	.	.	.	.	.
Betula alnoides LC509586	.	.	.	.	.	.	.	.	.	.	.	.	.	.	.	.	.	.	.	.	.	.	.	.	.	.	.	.	.	.	.	.	.	.	.	.	.	.	.	.	.	.	.	.	.	.	.	.	.
Betula alnoides LC509587	.	.	.	.	.	.	.	.	.	.	.	.	.	.	.	.	.	.	.	.	.	.	.	.	.	.	.	.	.	.	.	.	.	.	.	.	.	.	.	.	.	.	.	.	.	.	.	.	.
Strychnos axillaris LC509588	A	.	A	G	A	T	A	.	.	.	T	G	.	C	.	T	.	C	C	T	T	.	C	C	C	C	.	T	T	C	.	.	.	.	T	G	C	.	C	T	G	G	G	G	G	G	.	C	G
Strychnos axillaris LC509589	A	.	A	G	A	T	A	.	.	.	T	G	.	C	.	T	.	C	C	Y	T	.	C	C	C	C	.	T	T	C	.	.	.	.	T	G	C	.	C	T	G	G	G	G	G	G	.	C	G
Strychnos axillaris LC509590	A	.	A	G	A	T	A	.	.	.	T	G	.	C	.	T	.	C	C	Y	T	.	C	C	C	C	.	T	T	C	.	.	.	.	T	G	C	.	C	T	G	G	G	G	G	G	.	C	G
Strychnos axillaris LC509591	A	.	A	G	A	T	A	.	.	.	T	G	.	C	.	T	.	C	C	Y	T	.	C	C	C	C	.	T	T	C	.	.	.	.	T	G	C	.	C	T	G	G	G	G	G	G	.	C	G
Strychnos axillaris LC509592	A	.	A	G	A	T	A	.	.	.	T	G	.	C	.	T	.	C	C	Y	T	.	C	C	C	C	.	T	T	C	.	.	.	.	T	G	C	.	C	T	G	G	G	G	G	G	.	C	G
Strychnos axillaris LC509593	A	.	A	G	A	T	A	.	.	.	T	G	.	C	.	T	.	C	C	Y	T	.	C	C	C	C	.	T	T	C	.	.	.	.	T	G	C	.	C	T	G	G	G	G	G	G	.	C	G
Strychnos axillaris LC509594	A	.	A	G	A	T	A	.	.	.	T	G	.	C	.	T	.	C	C	Y	T	.	C	C	C	C	.	T	T	C	.	.	.	.	T	G	C	.	C	T	G	G	G	G	G	G	.	C	G
Strychnos axillaris LC509595	A	.	A	G	A	T	A	.	.	.	T	G	.	C	.	T	.	C	C	C	T	.	C	C	C	C	.	T	T	C	.	.	.	.	T	G	C	.	C	T	G	G	G	G	G	G	.	C	G
Ziziphus attopensis LC509596	.	G	.	G	.	A	A	A	.	.	.	.	G	C	.	A	A	G	G	.	A	C	A	C	C	.	A	A	C	G	A	A	T	T	.	G	C	A	.	T	C	.	C	.	C	C	C	C	G
Ziziphus attopensis LC509597	.	G	.	G	.	A	A	A	.	.	.	.	G	C	.	A	A	G	G	.	A	C	A	C	C	.	A	A	C	G	A	A	T	T	.	G	C	A	.	T	C	.	C	.	C	C	C	C	G
Ziziphus attopensis LC509598	.	G	.	G	.	A	A	A	.	.	.	.	G	C	.	A	A	G	G	.	A	C	A	C	C	.	A	A	C	G	A	A	T	T	.	G	C	A	.	T	C	.	C	.	C	C	C	C	G
Ziziphus attopensis LC509599	.	G	.	G	.	A	A	A	.	.	.	.	G	C	.	A	A	G	G	.	A	C	A	C	C	.	A	A	C	G	A	A	T	T	.	G	C	A	.	T	C	.	C	.	C	C	C	C	G
Betula alnoides LC509575	-	-	-	-	-	-	-	-	-	-	-	-	-	-	-	-	-	-	-	-	-	-
Betula alnoides LC509576	-	-	-	-	-	-	-	-	-	-	-	-	-	-	-	-	-	-	-	-	-	-
Betula alnoides LC509577	-	-	-	-	-	-	-	-	-	-	-	-	-	-	-	-	-	-	-	-	-	-
Betula alnoides LC509578	-	-	-	-	-	-	-	-	-	-	-	-	-	-	-	-	-	-	-	-	-	-
Betula alnoides LC509579	-	-	-	-	-	-	-	-	-	-	-	-	-	-	-	-	-	-	-	-	-	-
Betula alnoides LC509580	-	-	-	-	-	-	-	-	-	-	-	-	-	-	-	-	-	-	-	-	-	-
Betula alnoides LC509581	-	-	-	-	-	-	-	-	-	-	-	-	-	-	-	-	-	-	-	-	-	-
Betula alnoides LC509582	-	-	-	-	-	-	-	-	-	-	-	-	-	-	-	-	-	-	-	-	-	-
Betula alnoides LC509583	-	-	-	-	-	-	-	-	-	-	-	-	-	-	-	-	-	-	-	-	-	-
Betula alnoides LC509584	-	-	-	-	-	-	-	-	-	-	-	-	-	-	-	-	-	-	-	-	-	-
Betula alnoides LC509585	-	-	-	-	-	-	-	-	-	-	-	-	-	-	-	-	-	-	-	-	-	-
Betula alnoides LC509586	-	-	-	-	-	-	-	-	-	-	-	-	-	-	-	-	-	-	-	-	-	-
Betula alnoides LC509587	-	-	-	-	-	-	-	-	-	-	-	-	-	-	-	-	-	-	-	-	-	-
Strychnos axillaris LC509588	-	-	-	-	-	-	-	-	-	-	-	-	-	-	-	-	-	-	-	-	-	-
Strychnos axillaris LC509589	-	-	-	-	-	-	-	-	-	-	-	-	-	-	-	-	-	-	-	-	-	-
Strychnos axillaris LC509590	-	-	-	-	-	-	-	-	-	-	-	-	-	-	-	-	-	-	-	-	-	-
Strychnos axillaris LC509591	-	-	-	-	-	-	-	-	-	-	-	-	-	-	-	-	-	-	-	-	-	-
Strychnos axillaris LC509592	-	-	-	-	-	-	-	-	-	-	-	-	-	-	-	-	-	-	-	-	-	-
Strychnos axillaris LC509593	-	-	-	-	-	-	-	-	-	-	-	-	-	-	-	-	-	-	-	-	-	-
Strychnos axillaris LC509594	-	-	-	-	-	-	-	-	-	-	-	-	-	-	-	-	-	-	-	-	-	-
Strychnos axillaris LC509595	-	-	-	-	-	-	-	-	-	-	-	-	-	-	-	-	-	-	-	-	-	-
Ziziphus attopensis LC509596	T	C	G	C	A	T	T	C	T	G	T	A	C	T	G	T	A	T	G	T	C	A
Ziziphus attopensis LC509597	T	C	G	C	A	T	T	C	T	G	T	A	C	T	G	T	A	T	G	T	C	A
Ziziphus attopensis LC509598	T	C	G	C	A	T	T	C	T	G	T	A	C	T	G	T	A	T	G	T	C	A
Ziziphus attopensis LC509599	T	C	G	C	A	T	T	C	T	G	T	A	C	T	G	T	A	T	G	T	C	A
[truncated: 31 more columns]

## Sheet: ITS2
S3 Spreadsheet. ITS2 sequence alignment of the authentic samples.
Domain: Data
Betula alnoides LC509575	A	T	C	G	T	T	G	C	C	C	C	C	A	A	C	C	C	C	A	T	C	T	C	C	T	T	G	C	A	A	A	G	G	G	A	C	G	A	G	G	G	G	G	C	C	A	G	T	G
Betula alnoides LC509576	.	.	.	.	.	.	.	.	.	.	.	.	.	.	.	.	.	.	.	.	.	.	.	.	.	.	.	.	.	.	.	.	.	.	.	.	.	.	.	.	.	.	.	.	.	.	.	.	.
Betula alnoides LC509577	.	.	.	.	.	.	.	.	.	.	.	.	.	.	.	.	.	.	.	.	.	.	.	.	.	.	.	.	.	.	.	.	.	.	.	.	.	.	.	.	.	.	.	.	.	.	.	.	.
Betula alnoides LC509578	.	.	.	.	.	.	.	.	.	.	.	.	.	.	.	.	.	.	.	.	.	.	.	.	.	.	.	.	.	.	.	.	.	.	.	.	.	.	.	.	.	.	.	.	.	.	.	.	.
Betula alnoides LC509579	.	.	.	.	.	.	.	.	.	.	.	.	.	.	.	.	.	.	.	.	.	.	.	.	.	.	.	.	.	.	.	.	.	.	.	.	.	.	.	.	.	.	.	.	.	.	.	.	.
Betula alnoides LC509580	.	.	.	.	.	.	.	.	.	.	.	.	.	.	.	.	.	.	.	.	.	.	.	.	.	.	.	.	.	.	.	.	.	.	.	.	.	.	.	.	.	.	.	.	.	.	.	.	.
Betula alnoides LC509581	.	.	.	.	.	.	.	.	.	.	.	.	.	.	.	.	.	.	.	.	.	.	.	.	.	.	.	.	.	.	.	.	.	.	.	.	.	.	.	.	.	.	.	.	.	.	.	.	.
Betula alnoides LC509582	.	.	.	.	.	.	.	.	.	.	.	.	.	.	.	.	.	.	.	.	.	.	.	.	.	.	.	.	.	.	.	.	.	.	.	.	.	.	.	.	.	.	.	.	.	.	.	.	.
Betula alnoides LC509583	.	.	.	.	.	.	.	.	.	.	.	.	.	.	.	.	.	.	.	.	.	.	.	.	.	.	.	.	.	.	.	.	.	.	.	.	.	.	.	.	.	.	.	.	.	.	.	.	.
Betula alnoides LC509584	.	.	.	.	.	.	.	.	.	.	.	.	.	.	.	.	.	.	.	.	.	.	.	.	.	.	.	.	.	.	.	.	.	.	.	.	.	.	.	.	.	.	.	.	.	.	.	.	.
Betula alnoides LC509585	.	.	.	.	.	.	.	.	.	.	.	.	.	.	.	.	.	.	.	.	.	.	.	.	.	.	.	.	.	.	.	.	.	.	.	.	.	.	.	.	.	.	.	.	.	.	.	.	.
Betula alnoides LC509586	.	.	.	.	.	.	.	.	.	.	.	.	.	.	.	.	.	.	.	.	.	.	.	.	.	.	.	.	.	.	.	.	.	.	.	.	.	.	.	.	.	.	.	.	.	.	.	.	.
Betula alnoides LC509587	.	.	.	.	.	.	.	.	.	.	.	.	.	.	.	.	.	.	.	.	.	.	.	.	.	.	.	.	.	.	.	.	.	.	.	.	.	.	.	.	.	.	.	.	.	.	.	.	.
Strychnos axillaris LC509588	.	.	.	.	C	G	T	.	G	.	.	.	C	C	.	.	A	T	G	C	G	C	.	.	A	C	T	.	.	G	G	C	C	.	T	G	C	G	A	.	.	.	.	G	A	C	.	G	A
Strychnos axillaris LC509589	.	.	.	.	C	G	T	.	G	.	.	.	C	C	.	.	A	T	G	C	G	C	.	.	A	C	T	.	.	G	G	C	C	.	T	G	C	G	A	.	.	.	.	G	A	C	.	G	A
Strychnos axillaris LC509590	.	.	.	.	C	G	T	.	G	.	.	.	C	C	.	.	A	T	G	C	G	C	.	.	A	C	T	.	.	G	G	C	C	.	T	G	C	G	A	.	.	.	.	G	A	C	.	G	A
Strychnos axillaris LC509591	.	.	.	.	C	G	T	.	G	.	.	.	C	C	.	.	A	T	G	C	G	C	.	.	A	C	T	.	.	G	G	C	C	.	T	G	C	G	A	.	.	.	.	G	A	C	.	G	A
Strychnos axillaris LC509592	.	.	.	.	C	G	T	.	G	.	.	.	C	C	.	.	A	T	G	C	G	C	.	.	A	C	T	.	.	G	G	C	C	.	T	G	C	G	A	.	.	.	.	G	A	C	.	G	A
Strychnos axillaris LC509593	.	.	.	.	C	G	T	.	G	.	.	.	C	C	.	.	A	T	G	C	G	C	.	.	A	C	T	.	.	G	G	C	C	.	T	G	C	G	A	.	.	.	.	G	A	C	.	G	A
Strychnos axillaris LC509594	.	.	.	.	C	G	T	.	G	.	.	.	C	C	.	.	.	A	T	G	.	G	.	.	C	A	C	T	C	.	G	.	C	C	G	T	.	C	.	A	.	.	.	G	G	.	C	G	.
Strychnos axillaris LC509595	.	.	.	.	C	G	T	.	G	.	.	.	C	C	.	.	.	A	T	G	.	G	.	.	C	A	C	T	C	.	G	.	C	C	G	T	.	C	.	A	.	.	.	G	G	.	C	G	.
Ziziphus attopensis LC509596	.	C	A	A	C	G	T	T	G	.	.	.	C	C	.	A	.	.	C	C	.	A	A	.	G	.	C	G	.	C	C	A	C	.	G	A	.	G	.	.	.	A	A	G	G	G	.	G	.
Ziziphus attopensis LC509597	.	C	A	A	C	G	T	T	G	.	.	.	C	C	.	A	.	.	C	C	.	A	A	.	G	.	C	G	.	C	C	A	C	.	G	A	.	G	.	.	.	A	A	G	G	G	.	G	.
Ziziphus attopensis LC509598	.	C	A	A	C	G	T	T	G	.	.	.	C	C	.	A	.	.	C	C	.	A	A	.	G	.	C	G	.	C	C	A	C	.	G	A	.	G	.	.	.	A	A	G	G	G	.	G	.
Ziziphus attopensis LC509599	.	C	A	A	C	G	T	T	G	.	.	.	C	C	.	A	.	.	C	C	.	A	A	.	G	.	C	G	.	C	C	A	C	.	G	A	.	G	.	.	.	A	A	G	G	G	.	G	.
Betula alnoides LC509575	G	T	G	C	G	G	T	T	G	G	C	C	T	A	A	A	A	G	C	G	A	G	T	C	C	T	C	G	G	C	G	A	C	G	C	G	C	G	C	C	A	C	G	A	C	A	A	T	C
Betula alnoides LC509576	.	.	.	.	.	.	.	.	.	.	.	.	.	.	.	.	.	.	.	.	.	.	.	.	.	.	.	.	.	.	.	.	.	.	.	.	.	.	.	.	.	.	.	.	.	.	.	.	.
Betula alnoides LC509577	.	.	.	.	.	.	.	.	.	.	.	.	.	.	.	.	.	.	.	.	.	.	.	.	.	.	.	.	.	.	.	.	.	.	.	.	.	.	.	.	.	.	.	.	.	.	.	.	.
Betula alnoides LC509578	.	.	.	.	.	.	.	.	.	.	.	.	.	.	.	.	.	.	.	.	.	.	.	.	.	.	.	.	.	.	.	.	.	.	.	.	.	.	.	.	.	.	.	.	.	.	.	.	.
Betula alnoides LC509579	.	.	.	.	.	.	.	.	.	.	.	.	.	.	.	.	.	.	.	.	.	.	.	.	.	.	.	.	.	.	.	.	.	.	.	.	.	.	.	.	.	.	.	.	.	.	.	.	.
Betula alnoides LC509580	.	.	.	.	.	.	.	.	.	.	.	.	.	.	.	.	.	.	.	.	.	.	.	.	.	.	.	.	.	.	.	.	.	.	.	.	.	.	.	.	.	.	.	.	.	.	.	.	.
Betula alnoides LC509581	.	.	.	.	.	.	.	.	.	.	.	.	.	.	.	.	.	.	.	.	.	.	.	.	.	.	.	.	.	.	.	.	.	.	.	.	.	.	.	.	.	.	.	.	.	.	.	.	.
Betula alnoides LC509582	.	.	.	.	.	.	.	.	.	.	.	.	.	.	.	.	.	.	.	.	.	.	.	.	.	.	.	.	.	.	.	.	.	.	.	.	.	.	.	.	.	.	.	.	.	.	.	.	.
Betula alnoides LC509583	.	.	.	.	.	.	.	.	.	.	.	.	.	.	.	.	.	.	.	.	.	.	.	.	.	.	.	.	.	.	.	.	.	.	.	.	.	.	.	.	.	.	.	.	.	.	.	.	.
Betula alnoides LC509584	.	.	.	.	.	.	.	.	.	.	.	.	.	.	.	.	.	.	.	.	.	.	.	.	.	.	.	.	.	.	.	.	.	.	.	.	.	.	.	.	.	.	.	.	.	.	.	.	.
Betula alnoides LC509585	.	.	.	.	.	.	.	.	.	.	.	.	.	.	.	.	.	.	.	.	.	.	.	.	.	.	.	.	.	.	.	.	.	.	.	.	.	.	.	.	.	.	.	.	.	.	.	.	.
Betula alnoides LC509586	.	.	.	.	.	.	.	.	.	.	.	.	.	.	.	.	.	.	.	.	.	.	.	.	.	.	.	.	.	.	.	.	.	.	.	.	.	.	.	.	.	.	.	.	.	.	.	.	.
Betula alnoides LC509587	.	.	.	.	.	.	.	.	.	.	.	.	.	.	.	.	.	.	.	.	.	.	.	.	.	.	.	.	.	.	.	.	.	.	.	.	.	.	.	.	.	.	.	.	.	.	.	.	.
Strychnos axillaris LC509588	C	.	A	A	A	T	G	A	.	A	G	T	C	T	C	T	C	C	.	.	.	T	G	G	G	C	G	T	C	A	C	G	A	C	A	A	G	T	G	G	T	G	.	T	T	G	.	A	T
Strychnos axillaris LC509589	C	.	A	A	A	T	G	A	.	A	G	T	C	T	C	T	C	C	.	.	.	T	G	G	G	C	G	T	C	A	C	G	A	C	A	A	G	T	G	G	T	G	.	T	T	G	.	A	T
Strychnos axillaris LC509590	C	.	A	A	A	T	G	A	.	A	G	T	C	T	C	T	C	C	.	.	.	T	G	G	G	C	G	T	C	A	C	G	A	C	A	A	G	T	G	G	T	G	.	T	T	G	.	A	T
Strychnos axillaris LC509591	C	.	A	A	A	T	G	A	.	A	G	T	C	T	C	T	C	C	.	.	.	T	G	G	G	C	G	T	C	A	C	G	A	C	A	A	G	T	G	G	T	G	.	T	T	G	.	A	T
Strychnos axillaris LC509592	C	.	A	A	A	T	G	A	.	A	G	T	C	T	C	T	C	C	.	.	.	T	G	G	G	C	G	T	C	A	C	G	A	C	A	A	G	T	G	G	T	G	.	T	T	G	.	A	T
Strychnos axillaris LC509593	C	.	A	A	A	T	G	A	.	A	G	T	C	T	C	T	C	C	.	.	.	T	G	G	G	C	G	T	C	A	C	G	A	C	A	A	G	T	G	G	T	G	.	T	T	G	.	A	T
Strychnos axillaris LC509594	T	C	T	A	A	A	.	G	A	.	A	G	.	C	T	C	T	C	.	C	G	A	.	G	G	G	.	.	T	.	A	C	G	A	.	A	A	.	T	G	G	T	.	G	T	T	G	A	A
Strychnos axillaris LC509595	T	C	T	A	A	A	.	G	A	.	A	G	.	C	T	C	T	C	.	C	G	A	.	G	G	G	.	.	T	.	A	C	G	A	.	A	A	.	T	G	G	T	.	G	T	T	G	A	A
Ziziphus attopensis LC509596	C	G	.	.	C	.	G	C	C	A	A	A	A	C	G	T	.	.	T	C	C	C	C	G	G	C	G	A	C	G	A	G	.	.	.	C	G	C	A	G	C	A	A	T	.	G	G	.	G
Ziziphus attopensis LC509597	C	G	.	.	Y	.	G	C	C	A	A	A	A	C	G	T	.	.	G	T	C	C	C	.	G	G	.	.	A	.	.	.	G	C	G	C	.	.	.	A	G	.	A	.	T	C	G	G	T
Ziziphus attopensis LC509598	C	G	.	.	Y	.	G	C	C	A	A	A	A	C	G	T	.	.	G	T	C	C	C	.	G	G	.	.	A	.	.	.	G	C	G	C	.	.	.	A	G	.	A	.	T	C	G	G	T
Ziziphus attopensis LC509599	C	G	.	.	Y	.	G	C	C	A	A	A	A	C	G	T	.	.	G	T	C	C	C	.	G	G	.	.	A	.	.	.	G	C	G	C	.	.	.	A	G	.	A	.	T	C	G	G	T
Betula alnoides LC509575	C	G	T	G	C	C	G	T	G	T	T	G	C	T	C	A	T	C	G	T	G	T	G	C	T	C	T	T	T	G	A	C	C	C	T	G	C	T	G	T	G	T	C	G	C	G	C	T	A
Betula alnoides LC509576	.	.	.	.	.	.	.	.	.	.	.	.	.	.	.	.	.	.	.	.	.	.	.	.	.	.	.	.	.	.	.	.	.	.	.	.	.	.	.	.	.	.	.	.	.	.	.	.	.
Betula alnoides LC509577	.	.	.	.	.	.	.	.	.	.	.	.	.	.	.	.	.	.	.	.	.	.	.	.	.	.	.	.	.	.	.	.	.	.	.	.	.	.	.	.	.	.	.	.	.	.	.	.	.
Betula alnoides LC509578	.	.	.	.	.	.	.	.	.	.	.	.	.	.	.	.	.	.	.	.	.	.	.	.	.	.	.	.	.	.	.	.	.	.	.	.	.	.	.	.	.	.	.	.	.	.	.	.	.
Betula alnoides LC509579	.	.	.	.	.	.	.	.	.	.	.	.	.	.	.	.	.	.	.	.	.	.	.	.	.	.	.	.	.	.	.	.	.	.	.	.	.	.	.	.	.	.	.	.	.	.	.	.	.
Betula alnoides LC509580	.	.	.	.	.	.	.	.	.	.	.	.	.	.	.	.	.	.	.	.	.	.	.	.	.	.	.	.	.	.	.	.	.	.	.	.	.	.	.	.	.	.	.	.	.	.	.	.	.
Betula alnoides LC509581	.	.	.	.	.	.	.	.	.	.	.	.	.	.	.	.	.	.	.	.	.	.	.	.	.	.	.	.	.	.	.	.	.	.	.	.	.	.	.	.	.	.	.	.	.	.	.	.	.
Betula alnoides LC509582	.	.	.	.	.	.	.	.	.	.	.	.	.	.	.	.	.	.	.	.	.	.	.	.	.	.	.	.	.	.	.	.	.	.	.	.	.	.	.	.	.	.	.	.	.	.	.	.	.
Betula alnoides LC509583	.	.	.	.	.	.	.	.	.	.	.	.	.	.	.	.	.	.	.	.	.	.	.	.	.	.	.	.	.	.	.	.	.	.	.	.	.	.	.	.	.	.	.	.	.	.	.	.	.
Betula alnoides LC509584	.	.	.	.	.	.	.	.	.	.	.	.	.	.	.	.	.	.	.	.	.	.	.	.	.	.	.	.	.	.	.	.	.	.	.	.	.	.	.	.	.	.	.	.	.	.	.	.	.
Betula alnoides LC509585	.	.	.	.	.	.	.	.	.	.	.	.	.	.	.	.	.	.	.	.	.	.	.	.	.	.	.	.	.	.	.	.	.	.	.	.	.	.	.	.	.	.	.	.	.	.	.	.	.
Betula alnoides LC509586	.	.	.	.	.	.	.	.	.	.	.	.	.	.	.	.	.	.	.	.	.	.	.	.	.	.	.	.	.	.	.	.	.	.	.	.	.	.	.	.	.	.	.	.	.	.	.	.	.
Betula alnoides LC509587	.	.	.	.	.	.	.	.	.	.	.	.	.	.	.	.	.	.	.	.	.	.	.	.	.	.	.	.	.	.	.	.	.	.	.	.	.	.	.	.	.	.	.	.	.	.	.	.	.
Strychnos axillaris LC509588	.	T	G	T	.	G	C	.	.	G	A	.	A	G	G	.	.	T	.	C	C	C	C	G	A	.	C	C	.	A	.	.	.	G	C	.	A	G	T	G	T	C	T	C	G	A	.	G	.
Strychnos axillaris LC509589	.	T	G	T	.	G	C	.	.	G	A	.	A	G	G	.	.	T	.	C	C	C	C	G	A	.	C	C	.	A	.	.	.	G	C	.	A	G	T	G	T	C	T	C	G	A	.	G	.
Strychnos axillaris LC509590	.	T	G	T	.	G	C	.	.	G	A	.	A	G	G	.	.	T	.	C	C	C	C	G	A	.	C	C	.	A	.	.	.	G	C	.	A	G	T	G	T	C	T	C	G	A	.	G	.
Strychnos axillaris LC509591	.	T	G	T	.	G	C	.	.	G	A	.	A	G	G	.	.	T	.	C	C	C	C	G	A	.	C	C	.	A	.	.	.	G	C	.	A	G	T	G	T	C	T	C	G	A	.	G	.
Strychnos axillaris LC509592	.	T	G	T	.	G	C	.	.	G	A	.	A	G	G	.	.	T	.	C	C	C	C	G	A	.	C	C	.	A	.	.	.	G	C	.	A	G	T	G	T	C	T	C	G	A	.	G	.
Strychnos axillaris LC509593	.	T	G	T	.	G	C	.	.	G	A	.	A	G	G	.	.	T	.	C	C	C	C	G	A	.	C	C	.	A	.	.	.	G	C	.	A	G	T	G	T	C	T	C	G	A	.	G	.
Strychnos axillaris LC509594	T	C	.	.	T	.	.	C	T	G	G	A	G	A	G	G	A	T	T	G	C	C	C	.	G	A	C	C	C	T	.	A	.	.	G	C	G	A	.	.	.	.	.	T	.	.	A	C	G
Strychnos axillaris LC509595	T	C	.	.	T	.	.	C	T	G	G	A	G	A	G	G	A	T	T	G	C	C	C	.	G	A	C	C	C	T	.	A	.	.	G	C	G	A	.	.	.	.	.	T	.	.	A	C	G
Ziziphus attopensis LC509596	.	.	C	.	G	A	T	C	.	C	C	.	.	C	G	C	G	G	C	C	Y	C	A	.	R	G	A	G	A	C	C	.	.	A	A	C	G	C	.	C	C	G	.	A	.	C	A	G	C
Ziziphus attopensis LC509597	G	C	G	C	G	G	A	.	C	G	C	C	G	C	.	G	C	G	.	C	C	Y	C	A	C	R	G	A	G	A	C	.	.	.	A	A	.	G	C	G	C	C	G	C	A	C	.	A	G
Ziziphus attopensis LC509598	G	C	G	C	G	G	A	.	C	G	C	C	G	C	.	G	C	G	.	C	C	Y	C	A	C	R	G	A	G	A	C	.	.	.	A	A	.	G	C	G	C	C	G	C	A	C	.	A	G
Ziziphus attopensis LC509599	G	C	G	C	G	G	A	.	C	G	C	C	G	C	.	G	C	G	.	C	C	Y	C	A	C	A	G	A	G	A	C	.	.	.	A	A	.	G	C	G	C	C	G	C	A	C	.	A	G
[truncated: 31 more columns]
