# Supplementary material for: Verification of Thai ethnobotanical medicine “Kamlang Suea Khrong” driven by multiplex PCR and powerful TLC techniques
Source: PLoS One. 2021 Sep 17;16(9):e0257243. doi: 10.1371/journal.pone.0257243 (PMC8448358; doi:10.1371/journal.pone.0257243)
Supplement: S4 Spreadsheet — (XLSX) [file pone.0257243.s010.xlsx]

## Sheet: ITS
S4 Spreadsheet. K2P distance analysis based on K2P model.
ITS region
Betula_alnoides_LC509575
Betula_alnoides_LC509576	0
Betula_alnoides_LC509577	0	0
Betula_alnoides_LC509578	0	0	0
Betula_alnoides_LC509579	0	0	0	0
Betula_alnoides_LC509580	0	0	0	0	0
Betula_alnoides_LC509581	0	0	0	0	0	0
Betula_alnoides_LC509582	0	0	0	0	0	0	0
Betula_alnoides_LC509583	0	0	0	0	0	0	0	0
Betula_alnoides_LC509584	0	0	0	0	0	0	0	0	0
Betula_alnoides_LC509585	0	0	0	0	0	0	0	0	0	0
Betula_alnoides_LC509586	0	0	0	0	0	0	0	0	0	0	0
Betula_alnoides_LC509587	0	0	0	0	0	0	0	0	0	0	0	0
Strychnos_axillaris_LC509588	0.333725	0.333725	0.333725	0.333725	0.333725	0.333725	0.333725	0.333725	0.333725	0.333725	0.333725	0.333725	0.333725
Strychnos_axillaris_LC509589	0.333725	0.333725	0.333725	0.333725	0.333725	0.333725	0.333725	0.333725	0.333725	0.333725	0.333725	0.333725	0.333725	0
Strychnos_axillaris_LC509590	0.333725	0.333725	0.333725	0.333725	0.333725	0.333725	0.333725	0.333725	0.333725	0.333725	0.333725	0.333725	0.333725	0	0
Strychnos_axillaris_LC509591	0.333725	0.333725	0.333725	0.333725	0.333725	0.333725	0.333725	0.333725	0.333725	0.333725	0.333725	0.333725	0.333725	0	0	0
Strychnos_axillaris_LC509592	0.333725	0.333725	0.333725	0.333725	0.333725	0.333725	0.333725	0.333725	0.333725	0.333725	0.333725	0.333725	0.333725	0	0	0	0
Strychnos_axillaris_LC509593	0.333725	0.333725	0.333725	0.333725	0.333725	0.333725	0.333725	0.333725	0.333725	0.333725	0.333725	0.333725	0.333725	0	0	0	0	0
Strychnos_axillaris_LC509594	0.33299	0.33299	0.33299	0.33299	0.33299	0.33299	0.33299	0.33299	0.33299	0.33299	0.33299	0.33299	0.33299	0	0	0	0	0	0
Strychnos_axillaris_LC509595	0.333725	0.333725	0.333725	0.333725	0.333725	0.333725	0.333725	0.333725	0.333725	0.333725	0.333725	0.333725	0.333725	0.00163399	0	0	0	0	0	0
Ziziphus_attopensis_LC509596	0.273287	0.273287	0.273287	0.273287	0.273287	0.273287	0.273287	0.273287	0.273287	0.273287	0.273287	0.273287	0.273287	0.387345	0.387345	0.387345	0.387345	0.387345	0.387345	0.386458	0.384259
Ziziphus_attopensis_LC509597	0.276496	0.276496	0.276496	0.276496	0.276496	0.276496	0.276496	0.276496	0.276496	0.276496	0.276496	0.276496	0.276496	0.391352	0.391352	0.391352	0.391352	0.391352	0.391352	0.390451	0.388237	0.00156495
Ziziphus_attopensis_LC509598	0.275918	0.275918	0.275918	0.275918	0.275918	0.275918	0.275918	0.275918	0.275918	0.275918	0.275918	0.275918	0.275918	0.390451	0.390451	0.390451	0.390451	0.390451	0.390451	0.389554	0.387345	0.0015625	0
Ziziphus_attopensis_LC509599	0.277731	0.277731	0.277731	0.277731	0.277731	0.277731	0.277731	0.277731	0.277731	0.277731	0.277731	0.277731	0.277731	0.392401	0.392401	0.392401	0.392401	0.392401	0.392401	0.3915	0.389295	0.0015625	0	0

## Sheet: ITS1
S4 Spreadsheet. K2P distance analysis based on K2P model.
ITS1 region
Betula_alnoides_LC509575
Betula_alnoides_LC509576	0
Betula_alnoides_LC509577	0	0
Betula_alnoides_LC509578	0	0	0
Betula_alnoides_LC509579	0	0	0	0
Betula_alnoides_LC509580	0	0	0	0	0
Betula_alnoides_LC509581	0	0	0	0	0	0
Betula_alnoides_LC509582	0	0	0	0	0	0	0
Betula_alnoides_LC509583	0	0	0	0	0	0	0	0
Betula_alnoides_LC509584	0	0	0	0	0	0	0	0	0
Betula_alnoides_LC509585	0	0	0	0	0	0	0	0	0	0
Betula_alnoides_LC509586	0	0	0	0	0	0	0	0	0	0	0
Betula_alnoides_LC509587	0	0	0	0	0	0	0	0	0	0	0	0
Strychnos_axillaris_LC509588	0.511544	0.511544	0.511544	0.511544	0.511544	0.511544	0.511544	0.511544	0.511544	0.511544	0.511544	0.511544	0.511544
Strychnos_axillaris_LC509589	0.511544	0.511544	0.511544	0.511544	0.511544	0.511544	0.511544	0.511544	0.511544	0.511544	0.511544	0.511544	0.511544	0
Strychnos_axillaris_LC509590	0.511544	0.511544	0.511544	0.511544	0.511544	0.511544	0.511544	0.511544	0.511544	0.511544	0.511544	0.511544	0.511544	0	0
Strychnos_axillaris_LC509591	0.511544	0.511544	0.511544	0.511544	0.511544	0.511544	0.511544	0.511544	0.511544	0.511544	0.511544	0.511544	0.511544	0	0	0
Strychnos_axillaris_LC509592	0.511544	0.511544	0.511544	0.511544	0.511544	0.511544	0.511544	0.511544	0.511544	0.511544	0.511544	0.511544	0.511544	0	0	0	0
Strychnos_axillaris_LC509593	0.511544	0.511544	0.511544	0.511544	0.511544	0.511544	0.511544	0.511544	0.511544	0.511544	0.511544	0.511544	0.511544	0	0	0	0	0
Strychnos_axillaris_LC509594	0.511544	0.511544	0.511544	0.511544	0.511544	0.511544	0.511544	0.511544	0.511544	0.511544	0.511544	0.511544	0.511544	0	0	0	0	0	0
Strychnos_axillaris_LC509595	0.515107	0.515107	0.515107	0.515107	0.515107	0.515107	0.515107	0.515107	0.515107	0.515107	0.515107	0.515107	0.515107	0.00440531	0	0	0	0	0	0
Ziziphus_attopensis_LC509596	0.394375	0.394375	0.394375	0.394375	0.394375	0.394375	0.394375	0.394375	0.394375	0.394375	0.394375	0.394375	0.394375	0.591418	0.585439	0.585439	0.585439	0.585439	0.585439	0.585439	0.575537
Ziziphus_attopensis_LC509597	0.396813	0.396813	0.396813	0.396813	0.396813	0.396813	0.396813	0.396813	0.396813	0.396813	0.396813	0.396813	0.396813	0.59554	0.589519	0.589519	0.589519	0.589519	0.589519	0.589519	0.579518	0
Ziziphus_attopensis_LC509598	0.394375	0.394375	0.394375	0.394375	0.394375	0.394375	0.394375	0.394375	0.394375	0.394375	0.394375	0.394375	0.394375	0.591418	0.585439	0.585439	0.585439	0.585439	0.585439	0.585439	0.575537	0	0
Ziziphus_attopensis_LC509599	0.394375	0.394375	0.394375	0.394375	0.394375	0.394375	0.394375	0.394375	0.394375	0.394375	0.394375	0.394375	0.394375	0.591418	0.585439	0.585439	0.585439	0.585439	0.585439	0.585439	0.575537	0	0	0

## Sheet: ITS2
S4 Spreadsheet. K2P distance analysis based on K2P model.
ITS2 region
Betula_alnoides_LC509575
Betula_alnoides_LC509576	0
Betula_alnoides_LC509577	0	0
Betula_alnoides_LC509578	0	0	0
Betula_alnoides_LC509579	0	0	0	0
Betula_alnoides_LC509580	0	0	0	0	0
Betula_alnoides_LC509581	0	0	0	0	0	0
Betula_alnoides_LC509582	0	0	0	0	0	0	0
Betula_alnoides_LC509583	0	0	0	0	0	0	0	0
Betula_alnoides_LC509584	0	0	0	0	0	0	0	0	0
Betula_alnoides_LC509585	0	0	0	0	0	0	0	0	0	0
Betula_alnoides_LC509586	0	0	0	0	0	0	0	0	0	0	0
Betula_alnoides_LC509587	0	0	0	0	0	0	0	0	0	0	0	0
Strychnos_axillaris_LC509588	0.471847	0.471847	0.471847	0.471847	0.471847	0.471847	0.471847	0.471847	0.471847	0.471847	0.471847	0.471847	0.471847
Strychnos_axillaris_LC509589	0.471847	0.471847	0.471847	0.471847	0.471847	0.471847	0.471847	0.471847	0.471847	0.471847	0.471847	0.471847	0.471847	0
Strychnos_axillaris_LC509590	0.471847	0.471847	0.471847	0.471847	0.471847	0.471847	0.471847	0.471847	0.471847	0.471847	0.471847	0.471847	0.471847	0	0
Strychnos_axillaris_LC509591	0.471847	0.471847	0.471847	0.471847	0.471847	0.471847	0.471847	0.471847	0.471847	0.471847	0.471847	0.471847	0.471847	0	0	0
Strychnos_axillaris_LC509592	0.471847	0.471847	0.471847	0.471847	0.471847	0.471847	0.471847	0.471847	0.471847	0.471847	0.471847	0.471847	0.471847	0	0	0	0
Strychnos_axillaris_LC509593	0.471847	0.471847	0.471847	0.471847	0.471847	0.471847	0.471847	0.471847	0.471847	0.471847	0.471847	0.471847	0.471847	0	0	0	0	0
Strychnos_axillaris_LC509594	0.46857	0.46857	0.46857	0.46857	0.46857	0.46857	0.46857	0.46857	0.46857	0.46857	0.46857	0.46857	0.46857	0	0	0	0	0	0
Strychnos_axillaris_LC509595	0.46857	0.46857	0.46857	0.46857	0.46857	0.46857	0.46857	0.46857	0.46857	0.46857	0.46857	0.46857	0.46857	0	0	0	0	0	0	0
Ziziphus_attopensis_LC509596	0.393009	0.393009	0.393009	0.393009	0.393009	0.393009	0.393009	0.393009	0.393009	0.393009	0.393009	0.393009	0.393009	0.662466	0.662466	0.662466	0.662466	0.662466	0.662466	0.656963	0.656963
Ziziphus_attopensis_LC509597	0.402268	0.402268	0.402268	0.402268	0.402268	0.402268	0.402268	0.402268	0.402268	0.402268	0.402268	0.402268	0.402268	0.677173	0.677173	0.677173	0.677173	0.677173	0.677173	0.671457	0.671457	0.0046512
Ziziphus_attopensis_LC509598	0.402268	0.402268	0.402268	0.402268	0.402268	0.402268	0.402268	0.402268	0.402268	0.402268	0.402268	0.402268	0.402268	0.677173	0.677173	0.677173	0.677173	0.677173	0.677173	0.671457	0.671457	0.0046512	0
Ziziphus_attopensis_LC509599	0.407501	0.407501	0.407501	0.407501	0.407501	0.407501	0.407501	0.407501	0.407501	0.407501	0.407501	0.407501	0.407501	0.682833	0.682833	0.682833	0.682833	0.682833	0.682833	0.677083	0.677083	0.0046512	0	0
