# Supplementary material for: Verification of Thai ethnobotanical medicine “Kamlang Suea Khrong” driven by multiplex PCR and powerful TLC techniques
Source: PLOS journal article supplement (doi:10.1371/journal.pone.0257243), 2021-09-17
Supplement: S6 (10.1371/journal.pone.0257243.s006) [file journal.pone.0257243.s006]

### S3 Appendix.

#### Variation in ITS region of *S. axillaris* and *Z. attopensis*.

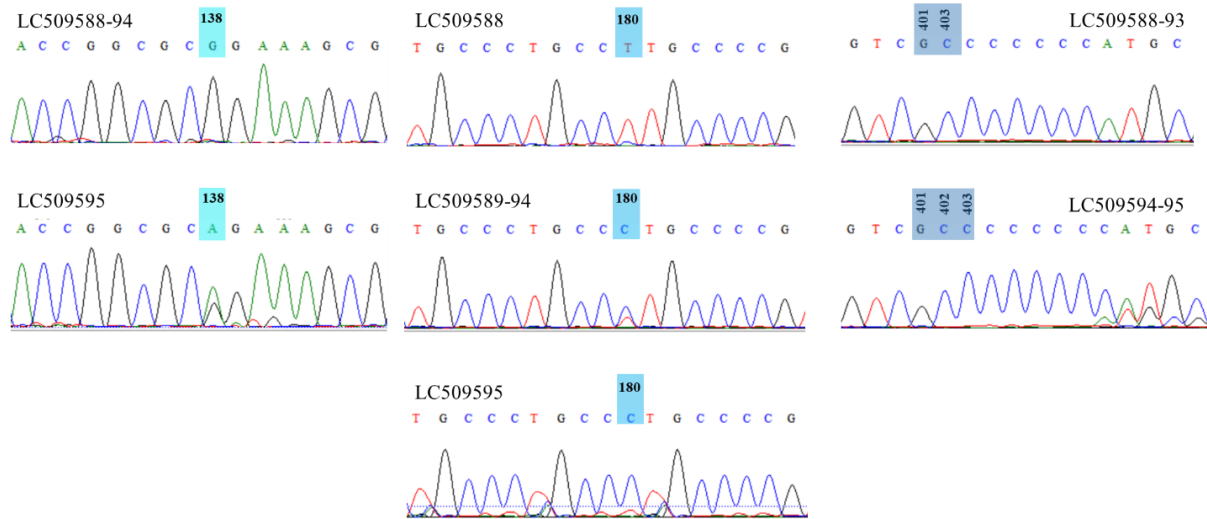

**S3 Fig A. SNPs in the ITS region amplified from leaves of *S. axillaris*.**

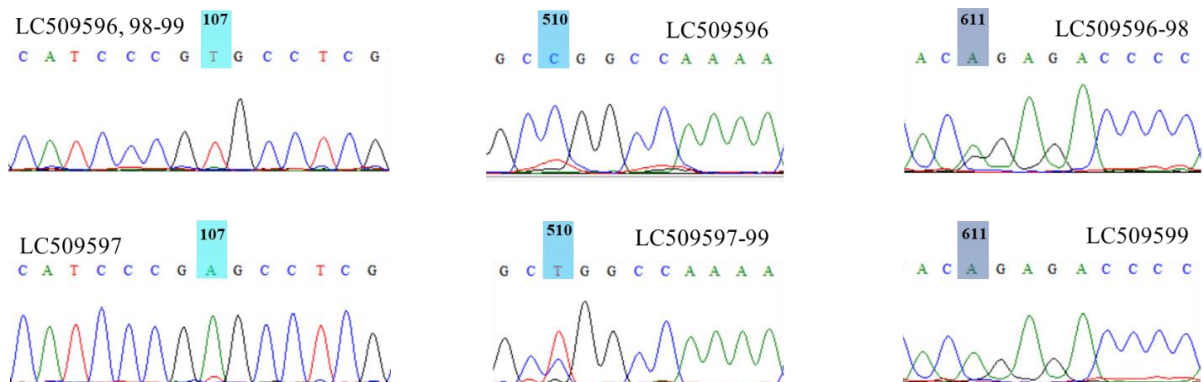

**S3 Fig B. SNPs in the ITS region amplified from leaves of *Z. attopensis*.**
